# Supplementary material for: Whole-Genome Analysis Revealed the Positively Selected Genes during the Differentiation of indica and Temperate japonica Rice
Source: PLoS One. 2015 Mar 16;10(3):e0119239. doi: 10.1371/journal.pone.0119239 (PMC4361536; doi:10.1371/journal.pone.0119239)
Supplement: S6 Table — (XLSX) [file pone.0119239.s006.xlsx]

## Sheet: Sheet1
Table S6. The NSSGs with outliers in rice genome except chromosome 1.
Chromosome	Position on the Chromosome	gene-ID	Nipponbare allele	other allele	Nipponbare amino acid	Changed amino acid	position in the protein	Allele frequency in TEJ	Allele frequency in IND	Fst	P (Simul Fst<sample Fst)	gene
2	386748	Os02t0106600-01	G	A	P	A	184	1	0.574468	0.27027	1
	Os02t0106600-01	1
2	2162063	LOC_Os02g04750.2	C	T	STOP	W	657	1	0.577889	0.267516	1
2	2164216	LOC_Os02g04750.2	A	G	S	P	464	1	0.303797	0.533981	0.828796
	LOC_Os02g04750.2	2
2	2782203	Os02t0150450-00	A	G	Q	R	59	1	0.375	0.454545	1
	Os02t0150450-00	1
2	4320552	Os02t0178200-00	C	G	P	A	4	1	0.424242	0.404255	0.852481
2	4321863	Os02t0178200-00	A	G	I	V	404	0.98913	0.00348432	0.971551	1
	Os02t0178200-00	2
2	4341795	LOC_Os02g08200.1	A	C	S	A	124	1	0	1	Fixed
	LOC_Os02g08200.1	1
2	5671824	Os02t0201700-00	G	A	L	F	171	1	0.178571	0.69697	0.89794
2	5671998	Os02t0201700-00	T	C	I	V	113	1	0	1	Fixed
2	5672013	Os02t0201700-00	G	A	R	C	107	1	0.0526316	0.9	0.963905
	Os02t0201700-00	3
2	6094362	LOC_Os02g11750.1	A	G	N	S	244	1	0	1	Fixed
	LOC_Os02g11750.1	1
2	6135557	LOC_Os02g11810.1	C	A	G	C	70	1	0.416058	0.412371	0.93158
2	6135719	LOC_Os02g11810.1	A	C	W	G	17	1	0	1	Fixed
2	6135822	LOC_Os02g11810.1	C	A	L	F	3	1	0.00598802	0.988095	1
	LOC_Os02g11810.1	3
2	7275135	Os02t0228900-01	C	A	R	L	213	1	0.583333	0.263158	1
	Os02t0228900-01	1
2	7762357	LOC_Os02g14140.1	C	T	D	N	119	1	0.257143	0.590909	0.996511
	LOC_Os02g14140.1	1
2	7799215	Os02t0237000-00	C	T	A	V	60	1	0.030303	0.941176	0.996399
2	7799949	Os02t0237000-00	A	G	T	P	151	1	0.0363636	0.929825	0.995188
	Os02t0237000-00	2
2	9008939	Os02t0258900-01	A	G	C	R	179	1	0.564103	0.278689	1
2	9009362	Os02t0258900-01	A	T	S	K	38	1	0.00716846	0.985765	1
	Os02t0258900-01	2
2	9036207	Os02t0259600-01	C	A	V	L	77	1	0.0153846	0.969697	1
2	9036387	Os02t0259600-01	C	G	A	P	17	1	0	1	Fixed
	Os02t0259600-01	2
2	9083058	LOC_Os02g15970.3	T	C	D	G	123	1	0.0113636	0.977528	1
2	9083263	LOC_Os02g15970.3	T	G	K	T	91	1	0.598086	0.251497	0.880819
	LOC_Os02g15970.3	2
2	9096738	LOC_Os02g15980.1	A	C	N	H	468	1	0.579646	0.266106	0.989624
2	9096805	LOC_Os02g15980.1	A	G	H	R	490	1	0.00342466	0.993174	1
2	9096969	LOC_Os02g15980.1	C	G	Q	E	544	1	0.464744	0.365427	0.738269
2	9097067	LOC_Os02g15980.1	C	A	D	E	577	1	0	1	Fixed
	LOC_Os02g15980.1	4
2	9421036	Os02t0264300-01	G	A	S	F	212	1	0.00961538	0.980952	1
2	9421150	Os02t0264300-01	C	T	R	Q	174	1	0.00581395	0.988439	1
2	9421226	Os02t0264300-01	C	T	A	T	149	1	0.0111111	0.978022	1
2	9422456	Os02t0264300-01	C	A	L	F	68	1	0.573913	0.270718	1
	Os02t0264300-01	4
2	9580998	Os02t0267200-00	C	G	P	A	17	1	0.05	0.904762	0.966083
2	9582164	Os02t0267200-00	A	C	I	L	259	1	0	1	Fixed
	Os02t0267200-00	2
2	11155556	Os02t0292800-01	T	G	Q	H	231	1	0	1	Fixed
	Os02t0292800-01	1
2	11381465	LOC_Os02g19430.1	A	G	N	S	70	1	0	1	Fixed
2	11381642	LOC_Os02g19430.1	C	G	T	S	129	1	0	1	Fixed
	LOC_Os02g19430.1	2
2	11538560	LOC_Os02g19670.1	C	A	V	F	206	0.994595	0	0.989247	1
2	11538736	LOC_Os02g19670.1	A	T	F	Y	147	1	0.00411523	0.991803	1
	LOC_Os02g19670.1	2
2	12240791	LOC_Os02g20710.1	G	A	G	D	27	0.992593	0.0180995	0.949745	0.996647
2	12240819	LOC_Os02g20710.1	T	G	D	E	36	0.992063	0.014218	0.95622	0.996862
2	12240884	LOC_Os02g20710.1	G	A	R	Q	58	1	0.0198675	0.961039	0.719588
2	12240917	LOC_Os02g20710.1	T	C	L	S	69	1	0.0160428	0.968421	1
	LOC_Os02g20710.1	4
2	12352508	Os02t0312500-02	C	T	R	C	142	0.99435	0.00869565	0.971524	1
	Os02t0312500-02	1
2	12630312	Os02t0317300-01	A	T	S	T	155	0.993103	0.00518135	0.975993	1
	Os02t0317300-01	1
2	12643686	Os02t0317500-01	T	G	H	P	188	1	0.0103806	0.979452	1
	Os02t0317500-01	1
2	12760036	LOC_Os02g21450.1	C	T	T	I	61	1	0	1	Fixed
	LOC_Os02g21450.1	1
2	12760937	LOC_Os02g21460.1	C	T	A	T	355	1	0.004	0.992032	1
2	12762986	LOC_Os02g21460.1	A	C	D	E	205	0.994318	0	0.988701	1
	LOC_Os02g21460.1	2
2	12770803	Os02t0319800-01	T	C	T	A	396	0.993671	0	0.987421	1
2	12772201	Os02t0319800-01	T	C	I	V	178	0.985294	0	0.971014	1
	Os02t0319800-01	2
2	12881263	Os02t0321600-01	T	G	V	G	49	1	0	1	Fixed
	Os02t0321600-01	1
2	12892440	Os02t0321800-01	C	T	T	I	135	0.993056	0.0046729	0.976905	1
	Os02t0321800-01	1
2	12923781	Os02t0322400-00	G	T	G	T	385	1	0	1	Fixed
	Os02t0322400-00	1
2	13054613	Os02t0324500-00	T	C	T	A	70*	0.993939	0	0.987952	1
	Os02t0324500-00	1
2	13193580	LOC_Os02g22110.1	A	G	L	S	45	0.983051	0	0.966667	1
	LOC_Os02g22110.1	1
2	13232112	Os02t0327500-01	G	T	A	S	306	1	0	1	Fixed
	Os02t0327500-01	1
2	14696570	Os02t0436400-01	C	G	V	L	312	1	0	1	Fixed
	Os02t0436400-01	1
2	15336112	LOC_Os02g25080.1	T	C	F	L	10	1	0	1	Fixed
	LOC_Os02g25080.1	1
2	15722215	LOC_Os02g25580.1	C	T	V	I	610	0.993197	0.00505051	0.976437	1
2	15724633	LOC_Os02g25580.1	A	G	F	L	488	1	0	1	Fixed
2	15725519	LOC_Os02g25580.1	G	C	D	E	443	0.993631	0	0.987342	1
	LOC_Os02g25580.1	3
2	15913342	LOC_Os02g25830.1	A	C	E	A	160	1	0	1	Fixed
	LOC_Os02g25830.1	1
2	15923899	LOC_Os02g25850.1	G	A	E	K	4	0.993289	0	0.986667	1
2	15924145	LOC_Os02g25850.1	A	G	T	A	86	0.953271	0	0.910714	0.96257
2	15924693	LOC_Os02g25850.1	G	T	E	STOP	243	1	0.00746269	0.985185	1
	LOC_Os02g25850.1	3
2	16216280	Os02t0461000-01	C	T	R	Q	56	1	0	1	Fixed
	Os02t0461000-01	1
2	16256083	Os02t0461600-02	T	C	H	R	6	1	0	1	Fixed
	Os02t0461600-02	1
2	16300465	Os02t0462800-01	T	G	S	A	24	1	0	1	Fixed
2	16300715	Os02t0462800-01	A	C	D	A	107	1	0	1	Fixed
	Os02t0462800-01	2
2	16334022	LOC_Os02g26480.2	C	G	L	F	136	1	0	1	Fixed
	LOC_Os02g26480.2	1
2	16429445	Os02t0465500-01	C	T	E	K	236	1	0	1	Fixed
	Os02t0465500-01	1
2	16438435	Os02t0465600-01	T	A	E	V	368	1	0	1	Fixed
	Os02t0465600-01	1
2	16477064	Os02t0466400-01	A	C	T	P	86	1	0	1	Fixed
	Os02t0466400-01	1
2	16780013	LOC_Os02g27190.1	C	A	C	STOP CONDON	147	1	0	1	Fixed
2	16780412	LOC_Os02g27190.1	G	A	INTRON 3' SPLICE SITE changed			1	0	1	Fixed
	LOC_Os02g27190.1	2
2	16789242	Os02t0471500-01	C	T	R	H	416	1	0.0636042	0.880399	0.903902
2	16790791	Os02t0471500-01	C	T	R	Q	271	1	0.0588235	0.888889	0.960629
2	16791127	Os02t0471500-01	C	T	S	N	202	1	0	1	Fixed
2	16791157	Os02t0471500-01	G	A	T	M	192	0.993671	0.0353535	0.919146	0.815591
	Os02t0471500-01	4
2	16931316	LOC_Os02g27400.1	T	G	D	E	319	1	0	1	Fixed
2	16931495	LOC_Os02g27400.1	C	T	A	V	379	1	0.101523	0.815668	0.88158
	LOC_Os02g27400.1	2
2	17224847	Os02t0478700-01	T	A	L	H	19	0.989474	0.0268456	0.9269	0.995587
	Os02t0478700-01	1
2	17318182	LOC_Os02g27950.1	C	T	S	N	467	0.982759	0	0.966102	0.717694
2	17318228	LOC_Os02g27950.1	C	T	G	R	452	0.976608	0	0.954286	0.996629
2	17318274	LOC_Os02g27950.1	C	G	L	F	436	0.965517	0.239316	0.550464	0.816597
2	17319181	LOC_Os02g27950.1	A	G	L	S	370	0.974684	0	0.950617	0.806793
2	17322774	LOC_Os02g27950.1	T	A	Q	H	80	0.981595	0.00429185	0.955312	0.995298
	LOC_Os02g27950.1	5
2	18320719	LOC_Os02g29520.1	T	C	K	R	86	1	0.00483092	0.990385	1
2	18320775	LOC_Os02g29520.1	A	C	I	M	67	1	0.259259	0.588235	0.957517
2	18320791	LOC_Os02g29520.1	T	C	Y	C	62	1	0.00490196	0.990244	1
	LOC_Os02g29520.1	3
2	21266252	LOC_Os02g34120.1	G	T	P	Q	437	1	0.232394	0.622857	0.817267
2	21266505	LOC_Os02g34120.1	A	C	S	A	353	1	0.00787402	0.984375	1
	LOC_Os02g34120.1	2
2	21347378	Os02t0546500-00	G	C	P	A	155	0.96	0	0.923077	0.994538
2	21347656	Os02t0546500-00	G	A	P	L	62	1	0.0232558	0.954545	0.996818
2	21347771	Os02t0546500-00	C	T	G	S	24	1	0.0731707	0.863636	0.892004
	Os02t0546500-00	3
2	21661383	Os02t0551900-01	T	C	V	A	149	0.783133	0	0.643564	0.841201
2	21661788	Os02t0551900-01	G	A	A	T	258	1	0.056391	0.893238	0.968143
2	21661831	Os02t0551900-01	C	T	T	M	272	1	0.0526316	0.9	0.968953
	Os02t0551900-01	3
2	21777944	Os02t0554200-00	T	C	K	R	71	1	0	1	Fixed
	Os02t0554200-00	1
2	21962824	Os02t0557300-01	G	C	T	R	197	1	0.00722022	0.985663	1
	Os02t0557300-01	1
2	22173630	LOC_Os02g35460.1	T	A	C	S	121	1	0.00689655	0.986301	1
	LOC_Os02g35460.1	1
2	22420156	Os02t0567000-01	A	G	I	T	97	1	0.00896861	0.982222	1
	Os02t0567000-01	1
2	22847472	Os02t0573400-01	A	C	S	A	126	0.971698	0.107914	0.750883	0.826592
2	22849002	Os02t0573400-01	G	T	A	E	69	1	0.578947	0.266667	0.956803
2	22849019	Os02t0573400-01	G	C	D	E	63	1	0.28125	0.560976	0.877044
	Os02t0573400-01	3
2	23420160	Os02t0585200-01	C	T	G	S	120	1	0.344828	0.487179	0.970314
	Os02t0585200-01	1
2	26311224	LOC_Os02g42280.1	C	T	G	D	297	0.63964	0	0.470199	0.975631
2	26313011	LOC_Os02g42280.1	T	G	D	A	91	0.84	0	0.724138	0.827104
	LOC_Os02g42280.1	2
2	26479481	Os02t0638400-01	T	C	H	R	249	0.97861	0.00367647	0.950793	0.996778
2	26481551	Os02t0638400-01	A	T	V	E	127	0.923077	0.0555556	0.752937	0.831924
	Os02t0638400-01	2
2	27273490	Os02t0654100-01	C	T	A	V	24	1	0.03125	0.939394	0.997178
2	27273784	Os02t0654100-01	A	C	K	N	90	0.990909	0.016	0.950493	0.996861
	Os02t0654100-01	2
2	27365519	LOC_Os02g43850.1	A	G	M	T	199	1	0.026178	0.94898	0.997239
2	27367852	LOC_Os02g43850.1	T	G	E	A	15	1	0.45	0.37931	0.839087
	LOC_Os02g43850.1	2
2	27526142	Os02t0658600-00	A	C	M	L	137	1	0.00704225	0.986014	1
2	27526641	Os02t0658600-00	G	T	S	I	205	1	0.105263	0.809524	0.879479
	Os02t0658600-00	2
2	27668531	LOC_Os02g44260.1	C	T	G	R	203	1	0	1	Fixed
2	27668972	LOC_Os02g44260.1	C	T	V	M	102	1	0.00408163	0.99187	1
	LOC_Os02g44260.1	2
2	27677140	LOC_Os02g44280.1	G	T	D	E	199	1	0.0344828	0.933333	0.995531
2	27677541	LOC_Os02g44280.1	C	A	A	E	66	1	0.184783	0.688073	0.83872
2	27677643	LOC_Os02g44280.1	G	A	H	Y	32	1	0	1	Fixed
	LOC_Os02g44280.1	3
2	27816749	Os02t0664000-01	T	G	I	S	40	1	0	1	Fixed
2	27816806	Os02t0664000-01	G	T	R	I	59	1	0.0909091	0.833333	0.875748
2	27817233	Os02t0664000-01	T	A	F	Y	98	1	0.00769231	0.984733	1
	Os02t0664000-01	3
2	27869475	Os02t0664700-02	T	G	R	S	165	1	0.00381679	0.992395	1
	Os02t0664700-02	1
2	27960544	Os02t0666600-01	C	T	T	I	137	1	0.0862069	0.84127	0.862255
2	27960682	Os02t0666600-01	C	T	S	L	182	1	0	1	Fixed
	Os02t0666600-01	2
2	28043838	LOC_Os02g44850.1	T	C	S	G	267	1	0	1	Fixed
	LOC_Os02g44850.1	1
2	28112699	Os02t0670400-01	A	G	D	G	57	0.990741	0	0.981651	1
	Os02t0670400-01	1
2	28133094	Os02t0670900-02	T	C	S	P	389	1	0.0106952	0.978836	1
2	28133193	Os02t0670900-02	G	A	A	T	422	1	0.00460829	0.990826	1
	Os02t0670900-02	2
2	28242137	Os02t0672400-01	C	T	S	N	103	1	0.0309735	0.939914	0.997071
	Os02t0672400-01	1
2	28546022	Os02t0677600-01	C	T	V	I	230	1	0.0235849	0.953917	0.996454
	Os02t0677600-01	1
2	28590117	Os02t0678300-01	G	A	A	T	86	1	0.060241	0.886364	0.959168
2	28591245	Os02t0678300-01	C	A	S	R	398	1	0.0238095	0.953488	0.969303
	Os02t0678300-01	2
2	28614838	LOC_Os02g45570.2	A	G	D	G	2	1	0.0243902	0.952381	0.996742
2	28615662	LOC_Os02g45570.2	A	G	T	A	205	0.97561	0	0.952381	0.996728
	LOC_Os02g45570.2	2
2	28632400	LOC_Os02g45600.1	A	G	K	R	184	1	0.0304183	0.940959	0.99734
2	28633512	LOC_Os02g45600.1	C	T	P	S	371	1	0.0373134	0.928058	0.816814
	LOC_Os02g45600.1	2
2	28659464	Os02t0680500-01	A	G	R	G	256	1	0.0230769	0.954887	0.996229
	Os02t0680500-01	1
2	28664240	Os02t0680700-01	T	C	K	R	254	1	0.0306122	0.940594	0.997278
	Os02t0680700-01	1
2	28796757	Os02t0682600-01	C	T	R	H	84	1	0.0300429	0.941667	0.996345
	Os02t0682600-01	1
2	28857387	LOC_Os02g45900.1	G	T	L	I	414	1	0.0287356	0.944134	0.996334
2	28857525	LOC_Os02g45900.1	G	A	H	STOP	376	1	0.0172414	0.966102	0.996865
2	28858188	LOC_Os02g45900.1	C	A	G	C	208	1	0.0122449	0.975806	0.999966
2	28858693	LOC_Os02g45900.1	G	T	L	I	68	1	0.0339806	0.934272	0.994778
	LOC_Os02g45900.1	4
2	28900310	Os02t0684800-01	A	C	S	A	51	1	0.020979	0.958904	0.996888
	Os02t0684800-01	1
2	29121641	LOC_Os02g46320.1	T	C	F	L	283	1	0	1	Fixed
2	29123473	LOC_Os02g46320.1	A	G	H	R	481	1	0	1	Fixed
2	29123568	LOC_Os02g46320.1	G	A	A	T	513	1	0	1	Fixed
	LOC_Os02g46320.1	3
2	29145366	Os02t0689000-01	C	G	A	G	32	1	0.0392157	0.924528	0.994876
	Os02t0689000-01	1
2	29221885	Os02t0690200-01	A	T	K	I	57	1	0.00738007	0.985348	1
	Os02t0690200-01	1
2	29249999	Os02t0690800-01	T	C	M	T	59	1	0.015873	0.96875	0.997239
	Os02t0690800-01	1
2	29341287	Os02t0693000-01	G	C	E	D	142	0.9375	0	0.882353	0.960744
2	29341298	Os02t0693000-01	G	A	G	E	146	1	0	1	Fixed
	Os02t0693000-01	2
2	29564431	Os02t0697400-01	C	T	A	T	564	1	0.101167	0.816254	0.875558
2	29567071	Os02t0697400-01	A	G	V	A	141	1	0.015748	0.968992	0.99676
2	29567439	Os02t0697400-01	A	C	D	E	18	1	0.0222222	0.956522	0.996818
	Os02t0697400-01	3
2	29712130	Os02t0700600-01	G	T	C	F	302	1	0.401639	0.426901	0.990968
2	29712887	Os02t0700600-01	A	T	T	S	412	1	0.0869565	0.84	0.852054
	Os02t0700600-01	2
2	30389896	Os02t0712500-01	G	T	S	Y	515	0.993789	0.266667	0.567183	0.911503
2	30392418	Os02t0712500-01	G	C	S	C	229	1	0.580645	0.265306	1
	Os02t0712500-01	2
2	31210514	Os02t0728600-01	C	T	V	I	138	1	0.00727273	0.98556	1
2	31212451	Os02t0728600-01	T	C	N	D	4	0.866667	0	0.764706	0.84777
	Os02t0728600-01	2
2	31234254	Os02t0729200-00	C	T	G	D	134	1	0.0181818	0.964286	0.99987
2	31234290	Os02t0729200-00	C	A	R	L	122	1	0.388889	0.44	0.801132
	Os02t0729200-00	2
2	31277951	Os02t0729900-00	C	T	R	W	91	1	0.5	0.333333	1
	Os02t0729900-00	1
2	31427224	Os02t0732600-01	A	C	H	Q	145	1	0	1	Fixed
	Os02t0732600-01	1
2	31572402	LOC_Os02g50250.1	C	T	A	V	72	1	0.0169492	0.966667	0.999928
2	31572473	LOC_Os02g50250.1	G	A	E	K	96	1	0.213115	0.648649	0.834883
2	31572763	LOC_Os02g50250.1	G	A	G	R	202	1	0.304348	0.533333	0.877044
	LOC_Os02g50250.1	3
2	32136666	LOC_Os02g51090.1	T	G	I	L	166	0.993289	0	0.986667	1
	LOC_Os02g51090.1	1
2	32169508	Os02t0745300-00	C	T	T	I	214	1	0.008	0.984127	1
2	32169660	Os02t0745300-00	C	T	P	S	265	1	0.0104167	0.979381	1
	Os02t0745300-00	2
2	32188242	Os02t0745700-01	T	G	I	M	228	1	0.013468	0.973422	1
	Os02t0745700-01	1
2	32192558	LOC_Os02g51160.1	C	T	P	L	227	1	0.00934579	0.981481	1
	LOC_Os02g51160.1	1
2	32574396	LOC_Os02g51730.1	A	C	C	G	483	1	0.00826446	0.983607	1
2	32577028	LOC_Os02g51730.1	G	A	P	S	40	1	0	1	Fixed
	LOC_Os02g51730.1	2
2	32595696	Os02t0754000-02	A	G	K	E	45	1	0.00784314	0.984436	1
	Os02t0754000-02	1
2	32606714	Os02t0754300-01	T	G	L	R	32	1	0	1	Fixed
2	32608014	Os02t0754300-01	G	A	V	M	152	1	0.100917	0.816667	0.892348
	Os02t0754300-01	2
2	32975592	LOC_Os02g52430.2	A	C	L	V	141	1	0.00769231	0.984733	1
2	32976986	LOC_Os02g52430.2	A	C	H	Q	33	1	0.204819	0.66	0.808592
	LOC_Os02g52430.2	2
2	33087377	Os02t0764500-01	C	A	L	F	115	0.993007	0	0.986111	1
	Os02t0764500-01	1
2	33167446	Os02t0766700-01	T	A	K	N	260	1	0.0487805	0.906977	0.962527
2	33167629	Os02t0766700-01	G	T	F	L	199	1	0.05	0.904762	0.967639
	Os02t0766700-01	2
2	33182336	Os02t0767100-01	T	C	S	P	27	1	0	1	Fixed
2	33183758	Os02t0767100-01	T	A	F	L	256	0.992958	0	0.986014	1
	Os02t0767100-01	2
2	33214336	LOC_Os02g52880.1	A	G	F	L	181	1	0	1	Fixed
	LOC_Os02g52880.1	1
2	33241256	Os02t0768200-01	A	T	V	D	137	0.994536	0.00735294	0.974533	1
2	33243219	Os02t0768200-01	T	C	T	A	7	1	0.0714286	0.866667	0.889847
	Os02t0768200-01	2
2	33348901	Os02t0769800-01	T	G	I	M	83	0.993197	0	0.986486	1
	Os02t0769800-01	1
2	33422740	Os02t0771200-01	C	T	A	T	312	0.993243	0.00471698	0.977188	1
2	33422979	Os02t0771200-01	A	G	V	A	232	1	0	1	Fixed
2	33423339	Os02t0771200-01	G	A	P	L	112	1	0	1	Fixed
	Os02t0771200-01	3
2	33554575	LOC_Os02g53360.1	G	T	A	E	72	1	0	1	Fixed
	LOC_Os02g53360.1	1
2	33573362	Os02t0774200-01	C	G	W	S	80	1	0	1	Fixed
	Os02t0774200-01	1
2	33665245	Os02t0775900-01	C	T	G	E	125	1	0	1	Fixed
2	33665564	Os02t0775900-01	C	A	A	S	19	1	0	1	Fixed
	Os02t0775900-01	2
2	33717602	Os02t0776700-01	G	T	D	Y	402	1	0.0460829	0.911894	0.80414
2	33718717	Os02t0776700-01	T	G	C	G	472	0.994595	0.00507614	0.979147	1
2	33718759	Os02t0776700-01	G	A	D	N	486	0.994253	0	0.988571	1
	Os02t0776700-01	3
2	33833864	Os02t0778300-01	A	C	I	L	83	0.992806	0	0.985714	1
2	33834231	Os02t0778300-01	A	G	Q	R	118	1	0	1	Fixed
2	33837092	Os02t0778300-01	A	G	Q	R	333	0.990566	0	0.981308	1
	Os02t0778300-01	3
2	33955836	Os02t0780550-01	G	A	R	K	54	1	0.0194175	0.961905	0.996715
2	33957376	Os02t0780550-01	G	A	S	N	335	0.993865	0.0285714	0.932261	0.995034
	Os02t0780550-01	2
2	34058928	LOC_Os02g54130.1	A	G	M	T	172	0.992063	0.026178	0.933245	0.996451
2	34060022	LOC_Os02g54130.1	C	T	D	N	97	1	0.0245902	0.952	0.99645
	LOC_Os02g54130.1	2
2	34087555	Os02t0782700-02	A	T	M	K	243	1	0.0180505	0.964539	0.99988
	Os02t0782700-02	1
2	34136729	LOC_Os02g54240.1	A	G	D	G	23	1	0.0756757	0.859296	0.8681
2	34136764	LOC_Os02g54240.1	G	A	V	I	35	0.988889	0.0618557	0.861609	0.8915
2	34137343	LOC_Os02g54240.1	C	T	P	S	228	1	0.0461538	0.911765	0.80118
2	34137886	LOC_Os02g54240.1	T	C	S	P	409	1	0.00431034	0.991416	1
	LOC_Os02g54240.1	4
2	34434283	Os02t0789600-01	A	G	D	G	17	1	0	1	Fixed
	Os02t0789600-01	1
2	34551637	LOC_Os02g54960.1	C	T	C	Y	204	1	0	1	Fixed
2	34554176	LOC_Os02g54960.1	A	C	D	A	339	1	0	1	Fixed
2	34554226	LOC_Os02g54960.1	A	G	S	G	356	1	0.00374532	0.992537	1
	LOC_Os02g54960.1	3
2	34567491	Os02t0792600-01	A	T	E	V	96	1	0	1	Fixed
	Os02t0792600-01	1
2	34588121	Os02t0793100-01	A	C	I	L	256	1	0	1	Fixed
2	34589636	Os02t0793100-01	G	A	R	K	562	1	0.302222	0.535836	0.824635
2	34590819	Os02t0793100-01	T	C	L	S	718	0.994186	0	0.988439	1
2	34590965	Os02t0793100-01	T	A	S	T	767	1	0	1	Fixed
	Os02t0793100-01	4
2	34631929	LOC_Os02g55100.1	T	C	M	T	26	1	0	1	Fixed
	LOC_Os02g55100.1	1
2	34896611	Os02t0798800-00	T	C	N	D	114	1	0	1	Fixed
2	34896784	Os02t0798800-00	C	T	R	H	56	1	0.103943	0.811688	0.872986
2	34896823	Os02t0798800-00	C	T	R	K	43	1	0.110672	0.800712	0.872482
	Os02t0798800-00	3
2	35146334	Os02t0803300-01	A	G	K	E	375	1	0	1	Fixed
2	35146761	Os02t0803300-01	C	G	A	G	451	1	0.419689	0.408759	0.953708
	Os02t0803300-01	2
2	35148125	Os02t0803400-01	C	T	S	N	75	1	0	1	Fixed
	Os02t0803400-01	1
2	35151077	Os02t0803600-01	A	G	I	V	51	1	0	1	Fixed
	Os02t0803600-01	1
2	35260862	Os02t0805800-01	C	T	G	E	692	1	0.384236	0.44484	0.776545
2	35262623	Os02t0805800-01	C	A	L	F	458	0.993548	0	0.987179	1
2	35263946	Os02t0805800-01	A	C	C	G	300	0.988701	0.00337838	0.970921	1
2	35264430	Os02t0805800-01	C	G	Q	H	199	1	0.00649351	0.987097	1
	Os02t0805800-01	4
2	35547457	LOC_Os02g56580.1	G	A	G	S	90	1	0.0142857	0.971831	0.996652
	LOC_Os02g56580.1	1
2	35720839	Os02t0813300-02	A	T	E	V	2	0.987179	0.0886076	0.812096	0.879006
2	35721006	Os02t0813300-02	A	G	N	D	58	1	0	1	Fixed
2	35722210	Os02t0813300-02	G	A	R	H	149	0.990868	0	0.9819	1
2	35722438	Os02t0813300-02	G	A	R	Q	225	0.99005	0.00357143	0.973179	1
	Os02t0813300-02	4
2	35788781	Os02t0814400-01	T	C	R	H	26	0.992	0	0.984127	1
	Os02t0814400-01	1
2	35801262	Os02t0814800-01	A	G	T	A	202	0.983871	0.012987	0.942625	1
2	35801700	Os02t0814800-01	C	A	A	D	258	1	0	1	Fixed
	Os02t0814800-01	2
2	35809425	Os02t0815200-01	C	T	P	L	7	0.980392	0	0.961538	0.994677
2	35809542	Os02t0815200-01	C	G	A	G	46	0.952381	0.375	0.373388	0.840192
2	35809619	Os02t0815200-01	A	G	T	A	72	0.958333	0	0.92	0.888157
	Os02t0815200-01	3
2	35813597	Os02t0815400-01	T	C	V	A	20	1	0	1	Fixed
2	35815972	Os02t0815400-01	A	G	T	A	289	0.987654	0	0.97561	1
	Os02t0815400-01	2
2	35850974	Os02t0816100-01	C	T	G	D	226	0.976879	0	0.954802	0.996576
2	35853390	Os02t0816100-01	A	G	F	L	2	1	0	1	Fixed
	Os02t0816100-01	2
2	36564247	Os02t0829850-00	C	G	E	D	83	0.988095	0.038835	0.901749	0.966456
	Os02t0829850-00	1
2	36568918	Os02t0830000-01	G	C	C	S	135	1	0.0131579	0.974026	1
2	36569020	Os02t0830000-01	G	T	R	L	168	1	0.189189	0.681818	0.869113
	Os02t0830000-01	2
2	36631217	Os02t0831200-01	T	C	K	E	74	1	0.0135135	0.973333	1
2	36631261	Os02t0831200-01	G	T	A	D	59	1	0.0149254	0.970588	1
	Os02t0831200-01	2
2	36670785	Os02t0832150-00	G	A	A	V	42	1	0.0238095	0.953488	0.994684
	Os02t0832150-00	1
3	630985	Os03t0111300-01	T	C	T	A	39	1	0	1	Fixed
3	631015	Os03t0111300-01	C	T	G	S	29	1	0.0227273	0.955556	0.93565
3	631089	Os03t0111300-01	T	C	K	R	4	1	0.0969697	0.823204	0.872627
	Os03t0111300-01	3
3	639522	LOC_Os03g02080.1	A	G	T	A	233	1	0.041841	0.919679	0.95284
	LOC_Os03g02080.1	1
3	1069714	Os03t0119966-01	C	G	T	S	142	1	0.152047	0.736041	0.925852
3	1070726	Os03t0119966-01	G	C	E	D	383	0.993827	0.00431034	0.979147	1
3	1071548	Os03t0119966-01	A	G	K	E	582	1	0.123239	0.780564	0.880421
	Os03t0119966-01	3
3	1077839	LOC_Os03g02820.1	G	C	W	S	15	1	0.117647	0.789474	0.897335
3	1079545	LOC_Os03g02820.1	G	C	R	T	236	1	0.0119522	0.976378	1
3	1079874	LOC_Os03g02820.1	A	G	K	R	312	0.79021	0.00833333	0.637191	0.87468
	LOC_Os03g02820.1	3
3	1444492	Os03t0125700-01	T	C	D	G	43	1	0.0125523	0.975207	1
	Os03t0125700-01	1
3	1546918	LOC_Os03g03590.1	G	C	P	A	226	1	0.00790514	0.984314	1
	LOC_Os03g03590.1	1
3	1588464	Os03t0128400-01	C	A	A	S	119	1	0.00803213	0.984064	1
	Os03t0128400-01	1
3	1623772	Os03t0129100-01	A	G	T	M	527	1	0.00775194	0.984615	1
	Os03t0129100-01	1
3	1931628	LOC_Os03g04250.1	A	G	C	R	34	1	0.00904977	0.982063	1
	LOC_Os03g04250.1	1
3	1992917	LOC_Os03g04370.1	T	C	V	A	129	1	0.0107527	0.978723	1
	LOC_Os03g04370.1	1
3	1998895	Os03t0136800-01	C	T	V	I	205	1	0.35	0.481481	0.932268
3	1999916	Os03t0136800-01	A	C	S	A	114	1	0	1	Fixed
	Os03t0136800-01	2
3	2054938	Os03t0137700-01	A	G	S	G	98	1	0.00414938	0.991736	1
	Os03t0137700-01	1
3	2227701	Os03t0140700-01	G	T	A	S	76	1	0	1	Fixed
3	2228643	Os03t0140700-01	G	A	G	D	309	1	0.00892857	0.982301	1
	Os03t0140700-01	2
3	2492170	Os03t0145400-00	G	T	A	D	723	1	0	1	Fixed
	Os03t0145400-00	1
3	2519526	LOC_Os03g05250.1	T	C	I	V	157	0.969325	0.00411523	0.932288	1
3	2519705	LOC_Os03g05250.1	T	C	D	G	97	0.96732	0.004329	0.928098	0.976733
3	2521426	LOC_Os03g05250.1	A	C	F	V	26	0.989583	0.00970874	0.960155	0.993138
	LOC_Os03g05250.1	3
3	2522410	LOC_Os03g05260.1	T	C	I	V	162	0.964286	0.00350877	0.924051	0.972252
	LOC_Os03g05260.1	1
3	3025984	Os03t0156600-01	A	G	L	P	19	1	0.0165289	0.96748	1
	Os03t0156600-01	1
3	3054829	Os03t0157400-01	C	T	R	K	699	0.994444	0.0268456	0.936672	1
3	3061082	Os03t0157400-01	T	C	I	M	294	0.994505	0.0291971	0.932344	0.818465
	Os03t0157400-01	2
3	3111022	Os03t0158600-00	T	C	V	A	188	1	0.0363636	0.929825	0.976293
	Os03t0158600-00	1
3	3163291	Os03t0159600-01	A	G	M	T	247	1	0	1	Fixed
	Os03t0159600-01	1
3	3165364	Os03t0159700-01	A	G	T	A	75	1	0.0070922	0.985915	1
3	3166153	Os03t0159700-01	A	G	I	V	209	1	0.149635	0.739683	0.938897
3	3166364	Os03t0159700-01	C	T	T	I	279	1	0.0105263	0.979167	1
	Os03t0159700-01	3
3	3171839	Os03t0159800-01	T	C	C	R	35	1	0.0105263	0.979167	1
	Os03t0159800-01	1
3	3504018	Os03t0165400-01	G	C	Q	E	818	1	0.027668	0.946154	1
3	3504251	Os03t0165400-01	T	C	K	R	812	1	0.0233645	0.954338	1
	Os03t0165400-01	2
3	3548338	Os03t0166200-00	T	C	V	A	9	0.888889	0	0.8	0.865946
3	3548570	Os03t0166200-00	T	C	V	A	56	0.632	0.00408163	0.45447	0.957902
3	3550042	Os03t0166200-00	C	G	Q	E	260	0.630435	0	0.460317	0.951057
	Os03t0166200-00	3
3	3689647	Os03t0168900-01	A	G	T	A	48	1	0	1	Fixed
	Os03t0168900-01	1
3	3728579	LOC_Os03g07380.1	G	C	R	G	16	1	0	1	Fixed
	LOC_Os03g07380.1	1
3	3845876	Os03t0172200-01	T	A	Q	L	342	0.994012	0.00826446	0.971703	1
3	3847493	Os03t0172200-01	T	C	D	G	160	1	0	1	Fixed
3	3848145	Os03t0172200-01	A	G	V	A	64	0.854839	0	0.746479	0.867303
	Os03t0172200-01	3
3	4048285	LOC_Os03g07960.1	C	T	D	N	203	1	0.00392157	0.992188	1
	LOC_Os03g07960.1	1
3	4128254	LOC_Os03g08130.1	C	G	W	S	83	0.995122	0.00315457	0.984002	1
	LOC_Os03g08130.1	1
3	4136040	Os03t0179100-00	C	T	S	L	12	1	0	1	Fixed
	Os03t0179100-00	1
3	4267405	Os03t0181800-01	G	A	V	I	8	1	0.183486	0.689922	0.883799
3	4268908	Os03t0181800-01	G	T	A	S	345	1	0.00421941	0.991597	1
3	4269280	Os03t0181800-01	G	A	V	I	405	1	0.00843882	0.983264	1
	Os03t0181800-01	3
3	4358861	Os03t0183500-01	C	T	G	S	31	1	0	1	Fixed
	Os03t0183500-01	1
3	4974395	Os03t0195300-01	A	G	V	A	590	0.993333	0.00384615	0.979093	1
3	4974533	Os03t0195300-01	A	G	C	R	572	0.995074	0.00914634	0.97207	1
3	4978008	Os03t0195300-01	T	C	Q	R	62	0.982558	0.00724638	0.951332	1
3	4978117	Os03t0195300-01	A	G	S	P	26	0.987421	0.003861	0.967465	1
	Os03t0195300-01	4
3	5151719	Os03t0197400-01	A	G	T	I	31	0.991228	0.00606061	0.970562	1
	Os03t0197400-01	1
3	5229364	Os03t0198900-02	G	A	T	I	177	1	0.00833333	0.983471	1
	Os03t0198900-02	1
3	5829566	LOC_Os03g11270.1	G	C	R	G	293	1	0.030303	0.941176	1
	LOC_Os03g11270.1	1
3	5841841	Os03t0211500-01	T	C	K	R	302	0.975155	0	0.951515	0.709447
3	5842610	Os03t0211500-01	C	G	V	L	128	0.988166	0.004	0.968642	1
3	5842858	Os03t0211500-01	G	T	P	H	75	0.97973	0	0.960265	1
3	5842922	Os03t0211500-01	T	C	T	A	54	0.991379	0.410891	0.402022	0.880095
	Os03t0211500-01	4
3	5896275	Os03t0212600-01	T	G	I	S	294	0.983333	0.0120482	0.943415	1
	Os03t0212600-01	1
3	6149335	Os03t0216500-00	C	G	E	D	126	1	0	1	Fixed
3	6149496	Os03t0216500-00	T	G	N	H	73	1	0	1	Fixed
	Os03t0216500-00	2
3	6566739	LOC_Os03g12370.2	T	G	S	A	146	0.972789	0	0.94702	1
	LOC_Os03g12370.2	1
3	6733165	Os03t0227300-01	G	A	A	T	387	1	0.334601	0.498575	0.984879
	Os03t0227300-01	1
3	6748153	LOC_Os03g12640.1	T	C	K	R	74	0.969512	0	0.940828	1
	LOC_Os03g12640.1	1
3	6880570	Os03t0228200-01	A	G	R	G	111	1	0	1	Fixed
	Os03t0228200-01	1
3	7027146	Os03t0231900-01	T	G	D	E	86	0.967742	0	0.9375	0.97202
	Os03t0231900-01	1
3	7038145	LOC_Os03g12940.3	A	G	V	A	249	0.967742	0	0.9375	1
3	7038358	LOC_Os03g12940.3	T	G	D	A	178	0.962963	0.0060241	0.916614	0.817512
	LOC_Os03g12940.3	2
3	7098097	Os03t0232900-01	T	C	I	V	85	0.993464	0	0.987013	1
	Os03t0232900-01	1
3	7188960	LOC_Os03g13240.1	C	T	G	E	462	0.9875	0	0.975309	1
3	7189098	LOC_Os03g13240.1	C	T	G	D	416	0.979592	0.00398406	0.952067	0.995366
3	7189223	LOC_Os03g13240.1	G	C	H	Q	374	0.994012	0.00380228	0.98052	1
	LOC_Os03g13240.1	3
3	7379644	Os03t0238800-01	G	A	A	V	465	0.987952	0.0046729	0.96689	1
	Os03t0238800-01	1
3	7523028	Os03t0241100-01	T	G	L	R	362	0.976562	0	0.954198	0.71063
3	7523265	Os03t0241100-01	T	C	L	S	409	0.994318	0	0.988701	1
3	7523357	Os03t0241100-01	T	C	F	L	440	0.995098	0	0.990244	1
3	7524104	Os03t0241100-01	G	A	V	I	633	1	0	1	Fixed
	Os03t0241100-01	4
3	7641627	Os03t0243600-01	C	T	A	V	89	1	0	1	Fixed
	Os03t0243600-01	1
3	7882915	LOC_Os03g14400.1	A	G	Y	H	455	0.872093	0	0.773196	0.878746
3	7883594	LOC_Os03g14400.1	C	A	K	N	271	1	0	1	Fixed
	LOC_Os03g14400.1	2
3	8148379	LOC_Os03g14850.1	C	G	S	T	89	0.989305	0.0283688	0.923687	0.973514
3	8148464	LOC_Os03g14850.1	C	T	G	R	61	0.99375	0.0836502	0.833274	0.8761
3	8148581	LOC_Os03g14850.1	C	A	V	L	22	0.983051	0.0285714	0.911154	0.812487
	LOC_Os03g14850.1	3
3	8378545	Os03t0257500-01	C	A	C	F	114	1	0.00729927	0.985507	1
3	8378745	Os03t0257500-01	T	C	I	M	76	0.976879	0.0106007	0.933839	1
	Os03t0257500-01	2
3	8674012	Os03t0262700-01	C	G	L	V	10	1	0	1	Fixed
	Os03t0262700-01	1
3	8750569	Os03t0264300-00	G	A	R	H	176	1	0.0479042	0.908571	0.805466
3	8750984	Os03t0264300-00	C	T	A	V	139	1	0.0336134	0.934959	0.978314
	Os03t0264300-00	2
3	9898588	Os03t0285800-01	T	A	I	F	367	1	0.0160643	0.968379	1
	Os03t0285800-01	1
3	10047953	Os03t0288800-01	A	G	H	R	483	1	0.011194	0.97786	1
3	10049242	Os03t0288800-01	G	A	G	S	639	1	0.321244	0.513725	0.996361
	Os03t0288800-01	2
3	10215564	Os03t0292100-01	A	G	Y	C	351	1	0.00738007	0.985348	1
	Os03t0292100-01	1
3	10281752	LOC_Os03g18250.1	A	C	L	R	90	1	0.0103093	0.979592	0.993154
3	10281797	LOC_Os03g18250.1	G	T	A	E	75	1	0.0253165	0.950617	1
	LOC_Os03g18250.1	2
3	10417741	Os03t0296200-00	G	A	R	H	27	0.988764	0.0530303	0.87713	0.89186
3	10418281	Os03t0296200-00	T	G	C	G	171	0.986207	0.0114286	0.950198	1
	Os03t0296200-00	2
3	10442787	Os03t0297000-01	C	G	C	S	109	0.985507	0	0.971429	1
	Os03t0297000-01	1
3	10882384	Os03t0305200-01	G	A	T	I	135	1	0.0108696	0.978495	1
3	10882643	Os03t0305200-01	T	C	I	V	48	1	0	1	Fixed
3	10882756	Os03t0305200-01	A	G	V	A	10	0.933333	0	0.875	0.908132
	Os03t0305200-01	3
3	10892641	LOC_Os03g19275.1	G	A	D	N	181	1	0	1	Fixed
3	10892687	LOC_Os03g19275.1	T	C	V	A	196	0.959184	0	0.921569	0.975178
	LOC_Os03g19275.1	2
3	10897981	Os03t0305500-01	A	G	K	R	470	0.993506	0	0.987097	1
	Os03t0305500-01	1
3	10961332	Os03t0306800-01	G	A	G	E	21	1	0.0322581	0.9375	0.978482
	Os03t0306800-01	1
3	11184100	Os03t0311600-01	C	T	A	V	44	0.945455	0	0.896552	0.947677
3	11184325	Os03t0311600-01	T	C	I	T	119	1	0	1	Fixed
	Os03t0311600-01	2
3	11473129	Os03t0317300-01	T	A	C	S	23	0.965517	0	0.933333	1
3	11473205	Os03t0317300-01	G	A	R	H	48	1	0	1	Fixed
3	11473273	Os03t0317300-01	A	G	M	V	71	0.945946	0	0.897436	0.947355
	Os03t0317300-01	3
3	11519326	Os03t0318400-01	G	A	A	T	300	0.970588	0	0.942857	1
	Os03t0318400-01	1
3	11558614	LOC_Os03g20340.1	G	T	A	S	14	1	0.46	0.369863	1
	LOC_Os03g20340.1	1
3	11611050	Os03t0320400-01	C	T	S	L	9	0.938144	0	0.883495	0.950466
3	11611449	Os03t0320400-01	G	C	R	P	100	0.97861	0	0.958115	0.993747
3	11611557	Os03t0320400-01	G	A	R	Q	136	0.931677	0	0.872093	0.945352
3	11611751	Os03t0320400-01	A	G	R	G	201	0.952381	0	0.909091	0.975178
3	11611781	Os03t0320400-01	A	G	I	V	211	0.94702	0	0.899371	0.81885
3	11611824	Os03t0320400-01	G	A	G	E	225	0.94375	0	0.893491	0.952794
3	11612529	Os03t0320400-01	C	T	T	M	460	0.954802	0	0.913514	0.975787
	Os03t0320400-01	7
3	11718423	Os03t0322200-01	C	A	E	D	105	0.967213	0	0.936508	1
	Os03t0322200-01	1
3	11724607	Os03t0322500-01	C	G	D	E	35	0.936709	0	0.880952	0.952061
	Os03t0322500-01	1
3	11868195	Os03t0324900-01	G	A	G	D	153	1	0.030303	0.941176	1
	Os03t0324900-01	1
3	11974471	LOC_Os03g21010.1	C	G	A	G	39	1	0.0322581	0.9375	0.906378
3	11974612	LOC_Os03g21010.1	G	A	C	Y	86	1	0.00862069	0.982906	0.996227
	LOC_Os03g21010.1	2
3	12320157	LOC_Os03g21470.1	T	G	D	A	224	1	0.0344828	0.933333	0.950144
3	12320212	LOC_Os03g21470.1	C	G	V	L	206	1	0.00763359	0.984848	1
3	12321070	LOC_Os03g21470.1	T	G	N	H	144	1	0.0105263	0.979167	1
3	12321232	LOC_Os03g21470.1	A	G	C	R	90	1	0.0181818	0.964286	0.976686
	LOC_Os03g21470.1	4
3	12441529	Os03t0335100-01	A	G	N	D	128	1	0.0625	0.882353	0.908132
3	12441907	Os03t0335100-01	C	G	Q	F	254	1	0	1	Fixed
	Os03t0335100-01	2
3	12491402	LOC_Os03g21770.1	A	C	Y	S	27	1	0.00408163	0.99187	1
	LOC_Os03g21770.1	1
3	13328323	Os03t0353333-00	G	A	A	V	30	1	0.0133333	0.973684	1
3	13328344	Os03t0353333-00	G	A	P	L	23	1	0.408163	0.42029	0.971565
	Os03t0353333-00	2
3	13363276	LOC_Os03g23040.1	T	C	W	R	16	0.973684	0	0.948718	1
	LOC_Os03g23040.1	1
3	14127623	Os03t0355300-01	G	C	R	G	204	1	0	1	Fixed
	Os03t0355300-01	1
3	14157414	Os03t0355800-01	G	A	R	C	209	1	0.00549451	0.989071	1
	Os03t0355800-01	1
3	14230224	Os03t0356526-00	T	G	Q	P	190	1	0	1	Fixed
	Os03t0356526-00	1
3	14379456	LOC_Os03g24290.1	G	A	R	Q	10	1	0.291667	0.548387	0.934644
3	14379581	LOC_Os03g24290.1	A	G	S	G	52	1	0	1	Fixed
3	14379593	LOC_Os03g24290.1	T	G	S	A	56	0.984848	0	0.970149	1
	LOC_Os03g24290.1	3
3	15492541	Os03t0378000-01	A	C	S	A	366	0.982659	0.00371747	0.958504	1
	Os03t0378000-01	1
3	16302383	Os03t0392300-01	T	A	F	L	199	0.962121	0.0047619	0.917543	1
	Os03t0392300-01	1
3	16387996	Os03t0393900-01	T	G	L	R	117	0.989011	0.0296296	0.920733	0.978051
3	16388748	Os03t0393900-01	G	T	V	L	273	0.974026	0.0310078	0.889306	0.97591
	Os03t0393900-01	2
3	16459873	Os03t0394900-01	A	G	W	R	222	0.974026	0.0120968	0.925486	0.971989
3	16461533	Os03t0394900-01	C	T	A	T	52	0.97619	0.0204082	0.91353	0.801482
	Os03t0394900-01	2
3	17689739	Os03t0412400-01	A	T	D	E	153	1	0.037037	0.928571	0.975465
3	17690119	Os03t0412400-01	G	T	H	N	27	1	0.227273	0.62963	0.947793
	Os03t0412400-01	2
3	18105712	Os03t0419700-00	C	G	A	P	42	1	0.0192308	0.962264	0.973959
3	18105753	Os03t0419700-00	C	T	R	H	28	1	0.0285714	0.944444	1
3	18105787	Os03t0419700-00	A	C	S	A	17	0.981481	0.0344828	0.897035	0.949804
3	18105811	Os03t0419700-00	C	T	A	T	9	1	0.0857143	0.842105	0.874256
	Os03t0419700-00	4
3	18393650	LOC_Os03g31180.1	A	C	I	L	343	1	0.00977199	0.980645	1
	LOC_Os03g31180.1	1
3	18468707	Os03t0426900-01	T	G	M	R	68	1	0	1	Fixed
	Os03t0426900-01	1
3	18487028	Os03t0427100-01	A	T	L	M	233	1	0.236559	0.617391	0.878802
3	18487135	Os03t0427100-01	A	G	L	S	197	1	0.00803213	0.984064	1
	Os03t0427100-01	2
3	18954158	LOC_Os03g32020.1	A	C	F	L	60	0.992857	0.00943396	0.967126	1
3	18954590	LOC_Os03g32020.1	G	A	S	F	4	1	0.010989	0.978261	0.705133
	LOC_Os03g32020.1	2
3	19080565	LOC_Os03g32250.1	C	T	R	C	79	1	0.0135135	0.973333	1
3	19080835	LOC_Os03g32250.1	C	T	R	C	95	1	0	1	Fixed
	LOC_Os03g32250.1	2
3	19526039	LOC_Os03g33012.1	A	G	R	G	336	0.987342	0.0046729	0.9657	1
3	19528856	LOC_Os03g33012.1	T	C	C	R	457	0.993939	0.0175439	0.953474	1
	LOC_Os03g33012.1	2
3	19571544	Os03t0445700-01	C	A	G	C	163	1	0.0238095	0.953488	1
	Os03t0445700-01	1
3	21248552	Os03t0566700-01	G	T	A	E	50	0.994737	0.00680272	0.976016	1
	Os03t0566700-01	1
3	21603374	Os03t0572300-01	G	A	S	L	134	0.993007	0.015544	0.955504	1
3	21604034	Os03t0572300-01	C	T	S	N	96	0.992537	0.0110497	0.96333	1
3	21604666	Os03t0572300-01	T	C	H	R	62	1	0.162679	0.720165	0.895881
	Os03t0572300-01	3
3	21721701	Os03t0574600-01	C	T	G	D	80	0.993631	0.00497512	0.977441	1
3	21721917	Os03t0574600-01	T	G	Q	P	8	1	0.165289	0.716312	0.889939
	Os03t0574600-01	2
3	21843123	Os03t0576600-00	T	C	T	A	120	1	0.334821	0.498328	0.979388
3	21843266	Os03t0576600-00	A	G	M	T	72	1	0.568282	0.275281	0.669816
	Os03t0576600-00	2
3	21958853	Os03t0578500-01	A	C	I	L	122	1	0.0243902	0.952381	0.952703
	Os03t0578500-01	1
3	22067781	Os03t0580800-01	A	C	Y	D	302	0.961538	0.0145631	0.897275	0.800482
3	22070439	Os03t0580800-01	T	G	S	R	114	1	0.322034	0.512821	0.982134
3	22073559	Os03t0580800-01	C	T	C	Y	32	1	0.268456	0.57672	1
	Os03t0580800-01	3
3	22154468	Os03t0582000-02	A	G	N	S	220	1	0.0153374	0.969789	0.994967
	Os03t0582000-02	1
3	23577663	Os03t0607200-01	C	G	G	A	34	1	0.0191083	0.9625	1
	Os03t0607200-01	1
3	23653621	Os03t0608600-01	C	A	G	W	212	1	0.0732601	0.863481	0.898076
3	23654223	Os03t0608600-01	T	C	H	R	11	1	0.0041841	0.991667	1
	Os03t0608600-01	2
3	23690956	Os03t0608800-01	C	A	L	M	56	1	0.00735294	0.985401	1
3	23696324	Os03t0608800-01	G	A	D	N	309	1	0.0132159	0.973913	0.995864
	Os03t0608800-01	2
3	23981828	LOC_Os03g41820.1	C	G	E	D	99	1	0.267516	0.577889	1
3	23982067	LOC_Os03g41820.1	C	A	D	Y	20	1	0.00851064	0.983122	1
	LOC_Os03g41820.1	2
3	24111792	Os03t0616450-00	T	A	L	M	32	1	0	1	Fixed
3	24111892	Os03t0616450-00	T	G	I	R	65	1	0.337079	0.495798	0.996876
	Os03t0616450-00	2
3	24194552	LOC_Os03g42100.1	T	C	I	V	120	1	0.307263	0.529915	0.906707
3	24194614	LOC_Os03g42100.1	G	A	S	F	99	0.99375	0.0133929	0.961149	0.994198
	LOC_Os03g42100.1	2
3	24212051	Os03t0618300-01	T	C	T	A	85	1	0	1	Fixed
	Os03t0618300-01	1
3	24261215	LOC_Os03g42240.1	A	G	T	A	218	1	0.00518135	0.989691	1
3	24261827	LOC_Os03g42240.1	T	C	V	A	331	1	0.00921659	0.981735	1
3	24263428	LOC_Os03g42240.1	G	A	A	T	452	1	0.165939	0.715356	0.905559
	LOC_Os03g42240.1	3
3	24286377	LOC_Os03g42280.1	T	A	F	I	163	1	0.00414938	0.991736	1
3	24287444	LOC_Os03g42280.1	C	A	N	K	314	1	0.0070922	0.985915	1
3	24288232	LOC_Os03g42280.1	C	A	Q	K	474	1	0.00549451	0.989071	1
	LOC_Os03g42280.1	3
3	24297332	LOC_Os03g42290.1	C	T	R	C	103	1	0.0176056	0.965398	0.995645
3	24297389	LOC_Os03g42290.1	G	T	G	W	122	1	0.251012	0.598706	0.809313
3	24298557	LOC_Os03g42290.1	T	C	I	T	270	1	0.00490196	0.990244	1
3	24298698	LOC_Os03g42290.1	G	A	R	H	317	1	0.0512821	0.902439	0.951021
3	24298734	LOC_Os03g42290.1	C	T	T	M	329	1	0.00952381	0.981132	1
	LOC_Os03g42290.1	5
3	24540434	LOC_Os03g42700.1	T	C	K	E	61	0.993506	0.333333	0.487954	0.965612
3	24540502	LOC_Os03g42700.1	G	A	A	V	38	1	0.301435	0.536765	0.906509
	LOC_Os03g42700.1	2
3	24775228	LOC_Os03g43050.1	A	G	I	T	197	1	0.0666667	0.875	0.901919
3	24775268	LOC_Os03g43050.1	T	C	R	G	184	0	0.959459	0.922078	0.972027
	LOC_Os03g43050.1	2
3	24811143	Os03t0629900-02	G	A	T	I	126	1	0.00420168	0.991632	1
	Os03t0629900-02	1
3	25520553	LOC_Os03g44050.1	G	C	R	G	424	1	0.44898	0.380282	0.800756
3	25523017	LOC_Os03g44050.1	A	C	Y	D	260	1	0.490196	0.342105	1
	LOC_Os03g44050.1	2
3	28059070	Os03t0684500-01	G	A	S	N	253	0.994083	0.00434783	0.979578	1
3	28059376	Os03t0684500-01	C	T	P	L	355	1	0.0163265	0.967871	1
3	28059789	Os03t0684500-01	T	C	Y	H	483	1	0.00334448	0.993333	1
	Os03t0684500-01	3
3	28899702	LOC_Os03g49430.1	A	C	S	A	488	0.963415	0.00813008	0.913308	0.950109
3	28901460	LOC_Os03g49430.1	G	A	P	S	309	1	0.0245902	0.952	1
3	28901522	LOC_Os03g49430.1	G	T	A	E	288	1	0.0606061	0.885714	0.91034
3	28901793	LOC_Os03g49430.1	T	C	T	A	198	1	0.0740741	0.862069	0.894482
3	28902213	LOC_Os03g49430.1	C	A	A	P	58	1	0.0045045	0.991031	1
	LOC_Os03g49430.1	5
3	28904480	Os03t0701200-01	A	G	S	G	131	1	0.00970874	0.980769	1
3	28905224	Os03t0701200-01	A	G	S	G	205	0.966667	0.0125	0.910829	0.816263
3	28905237	Os03t0701200-01	T	C	V	A	209	1	0.0104167	0.979381	1
3	28906358	Os03t0701200-01	T	C	V	A	245	1	0	1	Fixed
	Os03t0701200-01	4
3	28924541	LOC_Os03g49485.1	C	T	R	Q	88	1	0.0108108	0.97861	1
	LOC_Os03g49485.1	1
3	28991754	LOC_Os03g49570.1	C	A	L	I	134	1	0.285714	0.555556	0.955123
3	28993242	LOC_Os03g49570.1	T	A	I	N	314	1	0.0046729	0.990698	1
	LOC_Os03g49570.1	2
3	29035295	Os03t0703400-01	G	T	A	E	228	1	0.0138889	0.972603	1
	Os03t0703400-01	1
3	29057938	Os03t0703900-01	T	C	V	A	52	1	0	1	Fixed
3	29060300	Os03t0703900-01	C	G	L	V	245	0.946309	0.00952381	0.879281	0.942082
	Os03t0703900-01	2
3	29070869	LOC_Os03g49730.1	G	A	P	S	225	1	0.00502513	0.99	1
3	29072561	LOC_Os03g49730.1	G	T	S	STOP	9	1	0.4375	0.391304	0.777978
	LOC_Os03g49730.1	2
3	30492631	Os03t0728200-00	G	C	A	P	182	1	0.472727	0.358025	1
3	30493409	Os03t0728200-00	C	T	T	I	441	1	0.548263	0.291771	0.70178
3	30493600	Os03t0728200-00	T	G	F	V	505	1	0.0652174	0.877551	0.903041
3	30493686	Os03t0728200-00	C	G	D	E	533	1	0.550676	0.28976	0.69719
	Os03t0728200-00	4
3	30714788	Os03t0731900-01	C	T	V	I	367	1	0.0182648	0.964126	1
3	30716834	Os03t0731900-01	A	G	L	P	40	1	0.0377358	0.927273	0.942111
	Os03t0731900-01	2
3	30721182	Os03t0732000-00	G	C	N	K	352*	1	0.00469484	0.990654	1
3	30721849	Os03t0732000-00	T	C	D	G	264*	1	0.26087	0.586207	0.794879
	Os03t0732000-00	2
3	30786519	Os03t0733000-01	A	G	I	T	49	1	0.236967	0.616858	0.859426
3	30787717	Os03t0733000-01	C	T	A	T	66	1	0.025641	0.95	1
	Os03t0733000-01	2
3	30797466	LOC_Os03g52300.1	A	C	I	S	227	1	0	1	Fixed
3	30798255	LOC_Os03g52300.1	G	A	Q	STOP	188	1	0.0147059	0.971014	1
	LOC_Os03g52300.1	2
3	31204614	LOC_Os03g53080.1	C	T	R	K	345	1	0.00564972	0.988764	1
3	31205407	LOC_Os03g53080.1	C	T	G	D	150	1	0.30531	0.532203	0.863925
3	31208166	LOC_Os03g53080.1	G	A	R	W	12	1	0.047619	0.909091	0.801998
	LOC_Os03g53080.1	3
3	32608954	Os03t0766800-01	G	A	A	T	31	1	0.025641	0.95	1
	Os03t0766800-01	1
3	32610199	Os03t0766900-01	C	A	R	S	41	1	0.0277778	0.945946	1
3	32611563	Os03t0766900-01	C	T	P	L	152	1	0.0152091	0.970037	1
	Os03t0766900-01	2
3	32707905	Os03t0769400-01	C	G	D	E	419	1	0.023166	0.954717	1
	Os03t0769400-01	1
3	32804070	Os03t0771100-01	T	C	N	S	261	1	0	1	Fixed
3	32804236	Os03t0771100-01	G	C	L	V	206	1	0.31677	0.518868	0.992838
	Os03t0771100-01	2
3	32870954	Os03t0772900-01	C	T	E	K	124	1	0	1	Fixed
	Os03t0772900-01	1
3	32879353	Os03t0773000-01	C	A	A	S	370	1	0	1	Fixed
	Os03t0773000-01	1
3	32964208	LOC_Os03g56330.1	A	G	R	G	48	1	0.0106383	0.978947	1
	LOC_Os03g56330.1	1
3	32969546	LOC_Os03g56350.1	C	G	L	V	110	1	0.00699301	0.986111	1
	LOC_Os03g56350.1	1
3	33451462	Os03t0785500-01	T	C	C	R	190	1	0.0283401	0.944882	1
3	33451707	Os03t0785500-01	A	G	N	S	239	1	0.0347826	0.932773	0.973564
	Os03t0785500-01	2
3	33470229	Os03t0785900-01	A	G	V	A	208	1	0.0222222	0.956522	0.709771
3	33470590	Os03t0785900-01	G	A	P	S	88	1	0.492063	0.340426	0.952179
	Os03t0785900-01	2
3	33513549	Os03t0786600-01	A	C	Y	D	270	1	0.00775194	0.984615	1
3	33513599	Os03t0786600-01	C	A	G	V	253	1	0.52514	0.311355	0.796302
3	33514319	Os03t0786600-01	A	G	L	P	13	1	0.369231	0.460674	0.902349
	Os03t0786600-01	3
3	33702353	Os03t0790500-01	T	G	S	A	63	1	0.483333	0.348315	1
3	33702485	Os03t0790500-01	T	G	F	V	107	1	0.0784314	0.854545	0.894157
	Os03t0790500-01	2
3	34047729	Os03t0797000-01	G	A	A	V	50	1	0.336898	0.496	0.971493
3	34047760	Os03t0797000-01	T	C	S	G	40	1	0.117949	0.788991	0.863653
	Os03t0797000-01	2
3	34118080	Os03t0798200-01	A	G	T	A	5	1	0	1	Fixed
3	34121378	Os03t0798200-01	C	T	A	V	229	1	0.175258	0.701754	0.885995
3	34121397	Os03t0798200-01	A	C	R	S	235	1	0	1	Fixed
	Os03t0798200-01	3
3	34181645	Os03t0799600-02	A	T	I	F	61	1	0.0365854	0.929412	0.975371
3	34183243	Os03t0799600-02	T	C	V	A	205	1	0.0326531	0.936759	0.975465
	Os03t0799600-02	2
3	35055760	LOC_Os03g60150.1	T	G	E	C	80	1	0.0131004	0.974138	1
	LOC_Os03g60150.1	1
3	35081518	Os03t0816400-01	G	C	N	K	252	1	0.0179372	0.964758	0.995196
3	35081584	Os03t0816400-01	A	T	D	E	230	1	0.0368421	0.928934	0.975627
3	35081607	Os03t0816400-01	C	T	D	N	223	0.993789	0.04	0.910753	0.808158
3	35081823	Os03t0816400-01	C	T	G	S	151	1	0.0223642	0.95625	0.705613
	Os03t0816400-01	4
3	35327633	Os03t0821300-01	T	C	D	G	437	1	0.191919	0.677966	0.89153
3	35328339	Os03t0821300-01	C	T	A	T	202	1	0.264151	0.58209	0.999169
3	35328438	Os03t0821300-01	T	C	T	A	169	1	0.0322581	0.9375	0.978482
	Os03t0821300-01	3
3	35387313	Os03t0822700-01	T	G	S	A	29	1	0.0181818	0.964286	0.995076
	Os03t0822700-01	1
3	35444775	Os03t0823700-01	G	T	Q	K	59	1	0	1	Fixed
	Os03t0823700-01	1
3	35552173	Os03t0826000-01	C	T	G	R	639	0.994681	0	0.989418	1
3	35552331	Os03t0826000-01	G	A	S	F	586	0.993711	0.0917031	0.819597	0.896549
3	35553057	Os03t0826000-01	G	A	A	V	514	0.994048	0.247788	0.591497	0.802474
	Os03t0826000-01	3
3	36659277	Os03t0850600-01	C	A	G	C	105	1	0.490196	0.342105	1
	Os03t0850600-01	1
4	325110	Os04t0105100-01	A	G	T	A	77	0.546875	0.986755	0.270531	0.959531
4	325585	Os04t0105100-01	G	C	D	H	202	1	0.529148	0.307918	0.76537
4	326929	Os04t0105100-01	A	T	Y	F	379	0.827778	0.0185874	0.670618	0.828133
	Os04t0105100-01	3
4	4505502	Os04t0166400-02	T	C	I	V	7	1	0	1	Fixed
	Os04t0166400-02	1
4	4821748	Os04t0170500-01	T	C	H	R	138*	1	0.0391459	0.924658	0.998288
	Os04t0170500-01	1
4	6557369	Os04t0196200-00	A	C	I	L	99	0.965517	0.00869565	0.916117	0.784288
4	6557486	Os04t0196200-00	G	A	A	T	138	1	0.382775	0.446367	0.836735
4	6557565	Os04t0196200-00	C	T	S	L	164	1	0.0647059	0.878453	0.879926
4	6558524	Os04t0196200-00	G	C	V	L	272	0.95	0	0.904762	0.768045
4	6558552	Os04t0196200-00	T	C	V	A	281	0.950355	0	0.905405	0.97814
	Os04t0196200-00	5
4	7149796	Os04t0206600-01	A	G	M	T	399	0.969466	0.0227273	0.896368	0.976759
4	7149869	Os04t0206600-01	C	T	V	I	375	1	0.481203	0.350254	1
4	7150218	Os04t0206600-01	C	T	G	S	304	1	0.0215054	0.957895	1
4	7150317	Os04t0206600-01	G	C	P	A	271	1	0.571429	0.272727	1
	Os04t0206600-01	4
4	9742219	Os04t0250700-01	G	T	A	S	91	1	0.00985222	0.980488	1
4	9750172	Os04t0250700-01	G	T	V	F	274	1	0	1	Fixed
	Os04t0250700-01	2
4	11340529	Os04t0270200-01	C	T	A	T	95	1	0.105263	0.809524	0.872344
4	11340664	Os04t0270200-01	T	C	I	V	50	1	0	1	Fixed
	Os04t0270200-01	2
4	12928649	Os04t0293700-01	C	T	T	I	21	1	0.0625	0.882353	0.880315
4	12928666	Os04t0293700-01	A	G	N	D	27	0.989362	0	0.978947	1
4	12929188	Os04t0293700-01	T	C	S	P	115	1	0	1	Fixed
4	12929508	Os04t0293700-01	A	T	E	D	195	1	0.0217391	0.957447	1
4	12929873	Os04t0293700-01	T	C	STOP	Q	292	0.95614	0.0952381	0.743114	0.885453
	Os04t0293700-01	5
4	18585038	Os04t0379933-01	G	C	Q	E	30	1	0.413534	0.414894	0.984416
	Os04t0379933-01	1
4	20042597	Os04t0403701-01	T	C	I	V	502	1	0.0509259	0.903084	0.976426
	Os04t0403701-01	1
4	20146460	Os04t0405600-02	C	T	G	S	397	1	0.0461538	0.911765	0.979436
	Os04t0405600-02	1
4	20481086	Os04t0414100-01	A	T	T	S	55	0.991304	0.0125786	0.957919	0.711158
4	20481240	Os04t0414100-01	G	A	S	N	106	1	0.0172414	0.966102	1
	Os04t0414100-01	2
4	20518627	Os04t0414700-01	C	A	L	M	37	1	0.00763359	0.984848	1
4	20518787	Os04t0414700-01	A	G	Q	R	54	0.785714	0.0114286	0.625248	0.804879
	Os04t0414700-01	2
4	20914712	Os04t0422500-01	G	A	V	I	44	1	0.0895522	0.835616	0.859491
4	20914854	Os04t0422500-01	C	T	T	M	91	1	0	1	Fixed
	Os04t0422500-01	2
4	22866580	Os04t0450900-01	C	T	G	S	88	1	0.58	0.265823	1
	Os04t0450900-01	1
4	24942648	Os04t0491100-01	C	G	T	R	593	1	0.0310345	0.939799	1
	Os04t0491100-01	1
4	24988022	LOC_Os04g41480.1	G	C	R	P	42	1	0	1	Fixed
4	24988222	LOC_Os04g41480.1	G	A	A	T	109	1	0.0441176	0.915493	0.772967
	LOC_Os04g41480.1	2
4	25054930	Os04t0493100-01	C	T	S	N	44	1	0.0571429	0.891892	0.975041
	Os04t0493100-01	1
4	25067625	Os04t0493300-02	A	T	F	Y	149	1	0.0491071	0.906383	0.977709
4	25069491	Os04t0493300-02	T	A	N	Y	3	1	0.0152284	0.97	1
	Os04t0493300-02	2
4	25139636	Os04t0494800-01	A	G	R	G	2	1	0.046595	0.910959	0.981289
4	25140851	Os04t0494800-01	C	T	R	C	312	1	0.047619	0.909091	0.980657
4	25141032	Os04t0494800-01	A	G	H	R	372	1	0	1	Fixed
	Os04t0494800-01	3
4	25274191	LOC_Os04g41980.1	T	G	S	A	92	1	0.047619	0.909091	0.98081
	LOC_Os04g41980.1	1
4	27825389	Os04t0547900-01	C	T	P	S	311	1	0.239316	0.613793	0.892496
4	27825402	Os04t0547900-01	G	A	G	E	315	1	0.226337	0.630872	0.955539
	Os04t0547900-01	2
4	28151971	Os04t0554800-01	A	G	I	V	5	1	0.333333	0.5	0.986326
	Os04t0554800-01	1
4	28390644	Os04t0558500-01	G	C	Q	E	58	1	0.0862069	0.84127	0.868774
4	28390721	Os04t0558500-01	C	T	R	Q	32	1	0.578947	0.266667	1
	Os04t0558500-01	2
4	28427958	Os04t0559400-01	T	A	T	S	310	1	0.23622	0.617834	0.851446
4	28427981	Os04t0559400-01	C	T	R	K	96	1	0.04	0.923077	0.78816
4	28428049	Os04t0559400-01	T	G	E	D	73	1	0.0305085	0.940789	1
	Os04t0559400-01	3
4	28661539	LOC_Os04g47620.1	A	C	S	R	445	1	0	1	Fixed
4	28662383	LOC_Os04g47620.1	A	G	C	R	246	1	0.00934579	0.981481	1
	LOC_Os04g47620.1	2
4	28713862	Os04t0565200-01	G	A	V	I	77	1	0.032967	0.93617	0.999306
4	28714969	Os04t0565200-01	C	G	H	D	446	1	0.024	0.953125	1
	Os04t0565200-01	2
4	28740754	Os04t0565500-01	T	C	T	A	302	1	0.0243902	0.952381	1
	Os04t0565500-01	1
4	28923688	Os04t0567700-01	T	C	L	S	117	1	0.0133779	0.973597	1
	Os04t0567700-01	1
4	29171964	Os04t0571600-01	C	G	A	G	262	1	0.015625	0.969231	1
	Os04t0571600-01	1
4	29612248	Os04t0579200-01	C	T	A	T	177	1	0.0307692	0.940299	0.768723
4	29612281	Os04t0579200-01	T	C	S	G	166	1	0.0384615	0.925926	0.974222
	Os04t0579200-01	2
4	29894470	Os04t0583700-00	C	T	S	F	173	0.987179	0.036036	0.905162	0.980507
4	29895837	Os04t0583700-00	G	A	E	K	629	0.994975	0.0349206	0.922529	0.998157
	Os04t0583700-00	2
4	29982969	Os04t0585600-01	A	G	V	A	172	0.994624	0.0479705	0.897781	0.975784
	Os04t0585600-01	1
4	30005514	Os04t0585900-01	A	G	M	T	12	1	0.0361446	0.930233	0.998663
	Os04t0585900-01	1
4	30507369	Os04t0596900-00	G	A	T	I	13	1	0.0559441	0.89404	0.976237
	Os04t0596900-00	1
4	31098619	LOC_Os04g51796.1	G	T	D	E	128	1	0.0608696	0.885246	0.973705
	LOC_Os04g51796.1	1
4	33216180	Os04t0644700-00	A	T	N	Y	15	0.980392	0.0421053	0.880828	0.972053
4	33216816	Os04t0644700-00	A	G	T	A	82	0.877551	0.0588235	0.673039	0.852888
	Os04t0644700-00	2
4	34226860	Os04t0662800-01	T	C	L	S	535	1	0.00757576	0.984962	1
	Os04t0662800-01	1
4	34351787	LOC_Os04g56960.1	G	A	A	T	39	1	0	1	Fixed
	LOC_Os04g56960.1	1
4	34800997	LOC_Os04g57760.1	C	A	A	S	90	1	0	1	Fixed
	LOC_Os04g57760.1	1
4	34814073	Os04t0674200-01	C	T	A	V	36	1	0.0555556	0.894737	0.975975
	Os04t0674200-01	1
4	34851357	Os04t0674800-01	T	C	S	G	448	1	0.0645161	0.878788	0.879131
4	34851515	Os04t0674800-01	C	A	R	L	395	1	0.0526316	0.9	0.977803
	Os04t0674800-01	2
4	35372043	Os04t0684600-01	G	C	E	D	44	1	0.046875	0.910448	0.981367
	Os04t0684600-01	1
4	35485963	Os04t0686300-01	T	G	Q	H	45	1	0.0296296	0.942446	1
	Os04t0686300-01	1
4	35814998	Os04t0691900-01	A	G	N	S	511	0.994083	0.069869	0.857679	0.861083
4	35815033	Os04t0691900-01	C	G	Q	E	525	1	0.0730594	0.86383	0.86543
4	35815131	Os04t0691900-01	G	T	E	D	557	1	0.100372	0.817568	0.894071
4	35815726	Os04t0691900-01	A	T	Y	F	721	1	0.059322	0.888	0.973785
4	35816353	Os04t0691900-01	A	C	Y	S	775	1	0.0833333	0.846154	0.871716
4	35816700	Os04t0691900-01	G	T	R	L	851	1	0.0866142	0.84058	0.858675
4	35816718	Os04t0691900-01	G	A	R	H	857	1	0.105263	0.809524	0.880271
4	35817461	Os04t0691900-01	G	A	V	I	1105	1	0.102473	0.814103	0.886204
	Os04t0691900-01	8
5	120135	Os05t0102200-01	T	C	K	E	209	0.94382	0.00383142	0.886007	0.979892
5	120201	Os05t0102200-01	C	A	A	S	187	0.924242	0.315385	0.393291	0.709785
5	120227	Os05t0102200-01	C	G	R	P	178	0.938776	0	0.884615	0.980072
	Os05t0102200-01	3
5	141220	Os05t0102800-01	G	T	L	M	515	0.94375	0.353234	0.38244	0.688209
5	143271	Os05t0102800-01	T	C	S	G	179	0.94186	0	0.89011	0.981576
5	143289	Os05t0102800-01	G	A	H	Y	173	0.954286	0.358268	0.393698	0.704314
5	143779	Os05t0102800-01	T	G	E	D	62	0.940476	0.0551471	0.783823	0.854679
	Os05t0102800-01	4
5	663528	LOC_Os05g02180.1	T	C	V	A	23	0.928571	0	0.866667	0.981197
5	664163	LOC_Os05g02180.1	A	G	D	G	177	0.937984	0.193237	0.564367	0.75799
5	664499	LOC_Os05g02180.1	C	A	A	D	289	0.95	0.242105	0.520317	0.807079
	LOC_Os05g02180.1	3
5	1839537	Os05t0131900-01	T	G	S	A	46	0.479532	0.00340136	0.309429	1
5	1839610	Os05t0131900-01	T	C	L	P	70	0.549618	0	0.378947	0.805005
	Os05t0131900-01	2
5	2157882	LOC_Os05g04640.1	A	G	Y	H	398	1	0.05	0.904762	0.98514
	LOC_Os05g04640.1	1
5	2172922	Os05t0137600-01	T	A	M	K	2	1	0.574074	0.270588	1
5	2173045	Os05t0137600-01	A	C	N	T	43	0.986842	0.0917431	0.806181	0.878206
5	2173083	Os05t0137600-01	T	A	C	A	56	1	0.0847458	0.84375	0.891602
	Os05t0137600-01	3
5	2445907	Os05t0142500-00	C	T	A	T	69	0.984733	0.00546448	0.959059	0.994685
	Os05t0142500-00	1
5	2592209	Os05t0145400-01	C	T	S	N	289	0.970238	0	0.942197	0.999031
	Os05t0145400-01	1
5	2782912	Os05t0149000-01	G	C	M	I	174	0.981481	0	0.963636	1
	Os05t0149000-01	1
5	2836091	Os05t0149900-01	A	G	T	A	483	0.98895	0.00347222	0.971223	1
	Os05t0149900-01	1
5	3014534	LOC_Os05g06060.1	T	C	L	P	131	1	0.111111	0.8	0.981197
	LOC_Os05g06060.1	1
5	3200906	Os05t0155000-01	A	T	N	K	363	0.988024	0.0179372	0.941102	0.994943
5	3201089	Os05t0155000-01	C	A	V	L	337	1	0.188596	0.682657	0.896462
5	3201853	Os05t0155000-01	C	A	Q	H	178	0.985401	0.0789474	0.825075	0.887299
	Os05t0155000-01	3
5	3221256	Os05t0155300-01	T	C	V	A	152	0.99359	0.018018	0.951868	0.994954
	Os05t0155300-01	1
5	3617037	Os05t0161800-01	T	C	G	D	91	0.97561	0.0172414	0.918517	0.994946
	Os05t0161800-01	1
5	3652569	Os05t0162600-01	T	C	R	C	28	1	0.103053	0.813149	0.891402
5	3652583	Os05t0162600-01	T	A	N	I	296	1	0.121569	0.783217	0.90177
5	3655217	Os05t0162600-01	G	A	R	G	301	1	0	1	Fixed
	Os05t0162600-01	3
5	3658468	Os05t0162800-00	C	T	S	N	163	0.992063	0	0.984252	1
5	3659004	Os05t0162800-00	G	A	A	V	59	1	0.137681	0.757962	0.888812
5	3659206	Os05t0162800-00	G	T	T	K	20	1	0.19403	0.675	0.845669
	Os05t0162800-00	3
5	4054150	Os05t0167600-01	G	A	D	N	2	0.987952	0.251462	0.575399	0.799046
5	4055505	Os05t0167600-01	G	A	A	T	127	1	0.453846	0.375661	0.810243
5	4055584	Os05t0167600-01	G	T	C	F	153	1	0.541899	0.297101	0.754647
5	4055727	Os05t0167600-01	C	T	R	STOP	201	1	0.495935	0.336957	1
	Os05t0167600-01	4
5	4297651	LOC_Os05g07980.1	C	A	A	S	708	1	0	1	Fixed
5	4298208	LOC_Os05g07980.1	G	A	A	V	522	1	0	1	Fixed
5	4298238	LOC_Os05g07980.1	G	A	T	I	512	0.993865	0.00404858	0.979741	1
5	4300731	LOC_Os05g07980.1	A	G	L	S	4	1	0.0114943	0.977273	1
	LOC_Os05g07980.1	4
5	4568321	Os05t0176500-01	C	T	A	T	4	1	0.0333333	0.935484	0.99888
	Os05t0176500-01	1
5	6331173	Os05t0202300-01	G	C	E	Q	25	1	0.5	0.333333	0.863511
5	6331752	Os05t0202300-01	G	A	D	N	218	1	0.567568	0.275862	1
	Os05t0202300-01	2
5	7114178	LOC_Os05g12390.1	T	C	T	A	106	0.935185	0.00793651	0.862581	0.982588
	LOC_Os05g12390.1	1
5	7696763	Os05t0225800-01	T	A	Q	L	230	1	0.0309278	0.94	0.999173
5	7696815	Os05t0225800-01	A	G	S	P	213	1	0.0254777	0.950311	0.994844
	Os05t0225800-01	2
5	14333498	LOC_Os05g24760.1	T	C	S	P	164	1	0	1	Fixed
	LOC_Os05g24760.1	1
5	14336179	Os05t0312500-01	C	G	M	I	109	1	0.025	0.95122	1
	Os05t0312500-01	1
5	14396008	Os05t0313700-01	C	T	E	K	533	1	0.0165746	0.967391	1
5	14396079	Os05t0313700-01	G	C	P	R	494	0.993243	0.118644	0.774621	0.893922
5	14396547	Os05t0313700-01	G	A	T	I	353	0.993671	0.0244898	0.939622	0.994776
	Os05t0313700-01	3
5	14484261	Os05t0315100-00	C	T	A	T	127	1	0	1	Fixed
5	14484623	Os05t0315100-00	A	C	F	C	6	1	0	1	Fixed
	Os05t0315100-00	2
5	17849577	LOC_Os05g30780.1	A	G	Y	H	66	1	0	1	Fixed
	LOC_Os05g30780.1	1
5	19214936	LOC_Os05g32790.1	C	G	W	S	55	0.993789	0.00706714	0.97362	1
	LOC_Os05g32790.1	1
5	19847616	Os05t0407200-01	A	G	W	R	370	0.955696	0	0.915152	0.998408
5	19851935	Os05t0407200-01	C	A	V	L	103	0.961783	0.229075	0.557157	0.736907
	Os05t0407200-01	2
5	19996735	Os05t0409400-01	A	C	E	A	158	0.965035	0.00436681	0.923748	0.999158
5	19997778	Os05t0409400-01	G	A	S	N	280	0.981366	0.0116959	0.940306	0.994476
5	19997943	Os05t0409400-01	G	T	E	D	297	0.966216	0.00934579	0.916148	0.994585
5	19998067	Os05t0409400-01	A	G	R	G	339	0.954545	0.00456621	0.903972	0.983943
5	19998997	Os05t0409400-01	A	G	K	R	399	0.956522	0.0101523	0.896611	0.764772
5	19999163	Os05t0409400-01	A	G	H	R	416	0.961832	0.00921659	0.908238	0.998839
	Os05t0409400-01	6
5	20038832	Os05t0409900-00	T	A	T	S	78	1	0.00502513	0.99	0.930516
	Os05t0409900-00	1
5	20284501	LOC_Os05g34260.1	C	T	D	N	502	0.946809	0.00378788	0.891464	0.981717
	LOC_Os05g34260.1	1
5	20608129	Os05t0420300-00	C	G	S	T	179	1	0.0860215	0.841584	0.887361
5	20608142	Os05t0420300-00	G	A	R	W	175	0.985075	0.0135135	0.943933	0.994637
	Os05t0420300-00	2
5	20936348	LOC_Os05g35220.1	C	A	Q	H	97	1	0.0121951	0.975904	1
	LOC_Os05g35220.1	1
5	20953551	Os05t0427200-01	G	T	H	N	75	1	0.0114943	0.977273	1
	Os05t0427200-01	1
5	20975072	LOC_Os05g35310.1	A	G	I	M	303	0.995	0.00314465	0.98378	1
	LOC_Os05g35310.1	1
5	21058034	Os05t0429000-01	C	T	R	Q	570	1	0.0333333	0.935484	0.998841
5	21059469	Os05t0429000-01	T	C	M	V	469	0.994186	0.0183824	0.952343	1
	Os05t0429000-01	2
5	21221063	Os05t0432600-01	T	G	L	F	37	1	0.0617284	0.883721	0.984734
	Os05t0432600-01	1
5	21961830	Os05t0446900-01	C	A	V	F	257	1	0.0362903	0.929961	0.99833
5	21962651	Os05t0446900-01	A	G	L	P	69	0.985714	0.0425532	0.890264	0.98189
	Os05t0446900-01	2
5	22051104	Os05t0448300-01	G	A	E	K	8	1	0.349206	0.482353	0.900658
5	22053872	Os05t0448300-01	A	C	Q	P	309	1	0.0519481	0.901235	0.983541
	Os05t0448300-01	2
5	22115357	LOC_Os05g37700.1	C	A	P	H	242	1	0.514085	0.32093	0.822772
5	22116203	LOC_Os05g37700.1	T	G	S	A	422	1	0.0313725	0.939163	0.999159
	LOC_Os05g37700.1	2
5	22206571	Os05t0451300-01	A	G	M	T	139	1	0.0372671	0.928144	0.998233
5	22206581	Os05t0451300-01	T	C	I	V	136	1	0.0263158	0.948718	0.994805
5	22206628	Os05t0451300-01	C	T	G	D	120	1	0.0276498	0.946188	0.994709
	Os05t0451300-01	3
5	22444190	Os05t0455900-01	T	C	L	P	81	1	0	1	Fixed
5	22445255	Os05t0455900-01	T	C	F	S	436	1	0.00649351	0.987097	1
	Os05t0455900-01	2
5	22482755	Os05t0456900-01	A	G	V	A	69	1	0	1	Fixed
	Os05t0456900-01	1
5	22534771	Os05t0458000-02	G	A	A	T	75	0.981132	0	0.962963	1
5	22535910	Os05t0458000-02	A	G	H	R	113	0.992857	0.0046729	0.976514	1
5	22536249	Os05t0458000-02	T	G	H	Q	172	0.992754	0.0047619	0.976134	1
5	22537347	Os05t0458000-02	G	A	R	H	271	0.994413	0.012987	0.963251	1
	Os05t0458000-02	4
5	22673421	Os05t0460600-01	C	T	V	I	207	1	0	1	Fixed
	Os05t0460600-01	1
5	22679154	Os05t0460800-01	A	T	S	T	212	0.991597	0	0.983333	1
	Os05t0460800-01	1
5	22707771	LOC_Os05g38650.1	G	A	G	S	62	1	0.227273	0.62963	0.897672
5	22707879	LOC_Os05g38650.1	A	G	T	A	98	1	0	1	Fixed
	LOC_Os05g38650.1	2
5	22724304	Os05t0462000-00	T	C	K	R	58	1	0.00617284	0.98773	1
	Os05t0462000-00	1
5	22745032	Os05t0462200-00	G	T	A	E	145	1	0	1	Fixed
	Os05t0462200-00	1
5	22909807	Os05t0465800-01	G	A	C	Y	676	1	0.00380228	0.992424	1
	Os05t0465800-01	1
5	23105785	Os05t0469600-01	T	A	F	I	282	1	0.025641	0.95	0.994798
	Os05t0469600-01	1
5	23142856	Os05t0470650-01	T	C	F	L	16	1	0	1	Fixed
	Os05t0470650-01	1
5	24044041	Os05t0488000-01	A	C	K	D	142	1	0.014652	0.971119	1
5	24044160	Os05t0488000-01	T	A	Y	N	182	1	0.00943396	0.981308	1
	Os05t0488000-01	2
5	24075939	Os05t0488900-01	A	G	H	R	130	1	0.00390625	0.992218	1
5	24076356	Os05t0488900-01	G	A	D	N	196	1	0	1	Fixed
	Os05t0488900-01	2
5	24196782	Os05t0491400-01	C	T	S	N	200	1	0.265217	0.580756	1
5	24197533	Os05t0491400-01	G	C	L	V	140	1	0.217822	0.642276	0.930578
	Os05t0491400-01	2
5	24345448	Os05t0494700-01	T	G	S	A	4	1	0	1	Fixed
5	24345870	Os05t0494700-01	G	C	E	D	144	1	0.0545455	0.896552	0.983161
	Os05t0494700-01	2
5	24430876	Os05t0496400-00	C	T	T	I	102	1	0.0588235	0.888889	0.981596
5	24431352	Os05t0496400-00	G	A	G	S	232	1	0.0697674	0.869565	0.887916
	Os05t0496400-00	2
5	24882612	LOC_Os05g42400.1	T	A	K	I	44	1	0.0509804	0.902985	0.984462
5	24882662	LOC_Os05g42400.1	G	C	F	L	27	1	0.0431034	0.917355	0.985961
5	24882939	LOC_Os05g42400.1	C	T	R	Q	14	1	0.0657895	0.876543	0.903053
	LOC_Os05g42400.1	3
5	25275889	Os05t0509200-01	A	T	E	D	23	1	0.0526316	0.9	0.9837
	Os05t0509200-01	1
5	25291933	Os05t0509500-01	C	G	E	D	335	1	0.0139535	0.972477	0.99504
	Os05t0509500-01	1
5	25393496	Os05t0511400-01	T	C	L	P	298	1	0.0388889	0.925134	0.997763
5	25396373	Os05t0511400-01	A	G	H	R	535	1	0.0334928	0.935185	0.997928
	Os05t0511400-01	2
5	25545235	LOC_Os05g43830.1	G	T	P	Q	73	1	0	1	Fixed
5	25545446	LOC_Os05g43830.1	T	C	T	A	37	1	0.021978	0.956989	0.9951
	LOC_Os05g43830.1	2
5	25683569	Os05t0516600-01	G	A	G	S	131	1	0.0394737	0.924051	0.986519
	Os05t0516600-01	1
5	25695284	Os05t0516900-01	T	C	S	P	343	0.993631	0.0318182	0.925683	0.998867
	Os05t0516900-01	1
5	25720597	LOC_Os05g44140.1	A	G	N	S	58	1	0.0326797	0.936709	0.998915
5	25720841	LOC_Os05g44140.1	T	C	Y	H	98	0.990741	0.0297619	0.923869	0.998949
	LOC_Os05g44140.1	2
5	25728712	Os05t0518000-00	T	C	K	R	168	0.99375	0.0462185	0.899253	0.979942
	Os05t0518000-00	1
5	25846081	Os05t0519400-01	T	C	N	D	423	0.990566	0.0408163	0.902914	0.9803
5	25848823	Os05t0519400-01	T	C	T	A	116	1	0.0243902	0.952381	0.99494
	Os05t0519400-01	2
5	25860181	Os05t0519600-02	T	C	V	A	148	1	0.0202429	0.960317	0.994972
5	25861301	Os05t0519600-02	T	A	S	T	265	0.993464	0.049505	0.892707	0.979577
	Os05t0519600-02	2
5	26115425	Os05t0523300-01	G	C	Q	E	228	0.994152	0.0201613	0.948852	0.994516
5	26116455	Os05t0523300-01	A	G	I	T	107	1	0.0253165	0.950617	0.994863
	Os05t0523300-01	2
5	26156806	LOC_Os05g44900.1	G	C	N	K	497	1	0.0188679	0.962963	1
	LOC_Os05g44900.1	1
5	26342301	Os05t0529000-01	C	T	M	I	109	1	0.0288462	0.943925	0.994946
	Os05t0529000-01	1
5	26355517	Os05t0529400-01	G	A	V	I	79	0.988571	0.0282258	0.922524	0.997684
	Os05t0529400-01	1
5	26768287	LOC_Os05g46040.1	C	T	V	M	224	0.992754	0.0414747	0.905993	0.985398
5	26768756	LOC_Os05g46040.1	G	T	D	E	103	1	0	1	Fixed
	LOC_Os05g46040.1	2
5	26829762	Os05t0539000-00	T	A	D	E	19	1	0.0731707	0.863636	0.984306
5	26830299	Os05t0539000-00	T	C	E	M	198	0.934066	0.0308642	0.816778	0.861751
	Os05t0539000-00	2
5	26833432	Os05t0539100-00	G	A	R	H	89	1	0	1	Fixed
	Os05t0539100-00	1
5	26866036	LOC_Os05g46210.1	G	A	V	I	206	0.993671	0.0540541	0.884895	0.904758
5	26866180	LOC_Os05g46210.1	T	C	F	L	254	0.993902	0.0246914	0.939695	0.998648
	LOC_Os05g46210.1	2
5	26892579	Os05t0540100-01	C	G	E	Q	308	0.993506	0.0289256	0.930885	0.998511
	Os05t0540100-01	1
5	26931475	Os05t0541200-01	G	A	R	Q	196	1	0.0272374	0.94697	0.999192
	Os05t0541200-01	1
5	27528734	Os05t0552000-00	C	A	R	L	92	0.972603	0	0.946667	0.995061
	Os05t0552000-00	1
5	27531294	Os05t0552100-01	C	G	E	Q	701	0.960938	0	0.924812	0.99837
	Os05t0552100-01	1
5	27556724	Os05t0552500-02	T	C	S	L	265	0.948571	0.0819113	0.751798	0.859328
5	27557544	Os05t0552500-02	G	A	K	E	353	0.981132	0.00403226	0.954934	0.995177
	Os05t0552500-02	2
5	27580596	Os05t0552800-01	T	G	L	V	28	1	0	1	Fixed
5	27580981	Os05t0552800-01	A	C	E	A	156	0.939394	0	0.885714	0.979901
	Os05t0552800-01	2
5	27644211	Os05t0554500-01	A	G	R	G	328	0.965517	0	0.933333	0.998363
	Os05t0554500-01	1
5	27725012	Os05t0556000-02	A	C	K	T	9	0.97561	0	0.952381	0.995081
5	27728814	Os05t0556000-02	C	T	L	F	367	0.982036	0.136929	0.724458	0.85693
	Os05t0556000-02	2
5	27806300	Os05t0557400-01	C	A	E	D	554	0.953488	0	0.911111	0.98636
5	27807385	Os05t0557400-01	G	C	L	V	275	0.966216	0	0.934641	0.998359
5	27807524	Os05t0557400-01	C	T	V	M	268	0.969231	0	0.940299	0.994645
5	27808501	Os05t0557400-01	T	C	I	V	147	0.923077	0	0.857143	0.886303
5	27808560	Os05t0557400-01	T	C	H	R	127	0.947368	0	0.9	0.9854
5	27808844	Os05t0557400-01	A	C	W	G	70	1	0	1	Fixed
	Os05t0557400-01	6
5	27949322	Os05t0559800-00	A	G	M	V	1	1	0	1	Fixed
5	27949746	Os05t0559800-00	G	A	G	D	142	0.909091	0	0.833333	0.886547
	Os05t0559800-00	2
5	27981642	Os05t0560600-01	T	C	Y	H	153	0.935484	0	0.878788	0.980782
5	27981888	Os05t0560600-01	G	C	V	L	234	0.979798	0	0.960396	1
	Os05t0560600-01	2
5	28338044	Os05t0567500-01	A	C	S	A	85	0.96875	0	0.939394	0.994743
	Os05t0567500-01	1
5	28381214	Os05t0568300-00	G	A	A	V	138	0.987013	0	0.974359	1
	Os05t0568300-00	1
5	28707087	LOC_Os05g49900.1	G	C	N	K	497	1	0	1	Fixed
	LOC_Os05g49900.1	1
5	28884325	Os05t0578600-01	A	G	L	S	448*	0.991736	0	0.983607	1
5	28885274	Os05t0578600-01	A	T	S	T	335	1	0	1	Fixed
5	28885578	Os05t0578600-01	A	G	M	R	264	1	0.518248	0.317308	0.789186
	Os05t0578600-01	3
5	28903265	Os05t0579000-01	T	A	T	S	274	1	0.00645161	0.987179	1
	Os05t0579000-01	1
5	29297006	Os05t0586400-01	C	G	T	R	497	0.983333	0.011236	0.945001	0.994662
	Os05t0586400-01	1
5	29329831	Os05t0587100-01	A	G	S	P	170	0.986486	0.0229885	0.928412	0.99454
	Os05t0587100-01	1
5	29353297	Os05t0587400-01	C	T	V	I	335	0.989529	0.0230769	0.934178	0.994558
5	29353481	Os05t0587400-01	C	A	E	D	274	0.993902	0.0189394	0.95071	0.995204
5	29353573	Os05t0587400-01	G	A	H	Y	244	0.990521	0.149502	0.721459	0.873885
5	29353636	Os05t0587400-01	C	T	E	K	223	0.990099	0.147601	0.723521	0.875269
	Os05t0587400-01	4
5	29374770	LOC_Os05g51040.1	T	A	L	Q	138	0.993671	0.0324074	0.924656	0.997791
	LOC_Os05g51040.1	1
5	29627534	Os05t0593000-01	G	A	P	S	204	1	0.492754	0.339806	1
5	29628016	Os05t0593000-01	T	C	H	R	43	0.958333	0.037037	0.848805	0.847965
	Os05t0593000-01	2
5	20038832	Os05t0409900-00	T	A	T	S	78	1	0	1	Fixed
	Os05t0409900-00	1
6	246436	Os06t0103700-01	A	G	Y	H	105	1	0.088	0.838235	0.911614
6	246615	Os06t0103700-01	A	C	L	R	45	1	0	1	Fixed
	Os06t0103700-01	2
6	413113	Os06t0106100-01	G	C	N	K	151	1	0.00813008	0.983871	1
	Os06t0106100-01	1
6	2428309	LOC_Os06g05380.1	C	T	L	F	711	0.993464	0.0503876	0.891107	0.982865
	LOC_Os06g05380.1	1
6	4200504	Os06t0184100-01	T	G	Y	S	53	0.976562	0.0108696	0.93271	0.999999
	Os06t0184100-01	1
6	5734961	Os06t0212600-00	A	G	L	S	65	1	0	1	Fixed
6	5735129	Os06t0212600-00	G	T	A	E	9	1	0	1	Fixed
	Os06t0212600-00	2
6	5759919	LOC_Os06g11010.1	A	C	L	F	273	0.988166	0.00390625	0.968828	1
6	5760512	LOC_Os06g11010.1	T	C	P	S	303	0.994505	0.00344828	0.982199	1
	LOC_Os06g11010.1	2
6	6205758	Os06t0220500-01	A	C	T	P	334	0.928571	0.190476	0.552616	0.777111
6	6206029	Os06t0220500-01	G	T	R	L	424	1	0.413793	0.414634	0.978348
	Os06t0220500-01	2
6	6534064	LOC_Os06g12190.1	C	G	D	E	106	0.947368	0.45614	0.288235	0.559908
6	6534819	LOC_Os06g12190.1	A	C	D	A	358	0.976744	0.40625	0.381411	1
	LOC_Os06g12190.1	2
6	6757861	LOC_Os06g12460.1	G	A	R	K	166	1	0.469751	0.360775	1
	LOC_Os06g12460.1	1
6	6796586	Os06t0231400-01	C	G	G	R	286	0.425926	0	0.270588	1
	Os06t0231400-01	1
6	7224052	Os06t0239100-01	T	C	L	P	23	1	0	1	Fixed
	Os06t0239100-01	1
6	8250878	Os06t0258000-01	G	C	E	Q	158	1	0	1	Fixed
	Os06t0258000-01	1
6	9410677	LOC_Os06g16440.1	T	C	K	R	27	1	0	1	Fixed
	LOC_Os06g16440.1	1
6	11275949	Os06t0300600-01	A	C	I	S	23	1	0	1	Fixed
	Os06t0300600-01	1
6	12850225	LOC_Os06g22050.1	T	C	S	G	93	1	0.0526316	0.9	0.983747
	LOC_Os06g22050.1	1
6	13111920	Os06t0329900-01	A	G	K	E	324	0.972973	0.0273973	0.894114	0.984479
	Os06t0329900-01	1
6	13236901	Os06t0332400-02	A	G	K	R	287	0.991228	0.21134	0.634251	0.821351
6	13237476	Os06t0332400-02	C	T	P	L	422	0.972222	0.0257511	0.895811	0.984409
6	13238219	Os06t0332400-02	T	C	L	S	530	0.94	0.0297872	0.829244	0.864485
	Os06t0332400-02	3
6	13431065	LOC_Os06g22880.1	A	C	S	A	25	1	0.00806452	0.984	1
	LOC_Os06g22880.1	1
6	13698484	Os06t0341300-01	C	G	A	G	90	1	0	1	Fixed
6	13699133	Os06t0341300-01	A	G	T	A	242	1	0.104651	0.810526	0.910027
	Os06t0341300-01	2
6	13962824	Os06t0346300-00	A	G	Q	R	34	0.941176	0.0457143	0.80199	0.889686
6	13963432	Os06t0346300-00	T	C	I	T	102	0.994152	0.298701	0.529022	0.855697
6	13963732	Os06t0346300-00	A	G	M	V	169	0.972727	0.0432099	0.864222	0.879862
6	13963759	Os06t0346300-00	G	A	E	K	178	1	0.0461538	0.911765	0.986809
6	13963959	Os06t0346300-00	C	T	T	I	204	1	0.0289855	0.943662	0.947979
	Os06t0346300-00	5
6	14599122	Os06t0354700-01	C	G	A	G	429	0.968992	0.0276243	0.886184	0.98337
6	14599280	Os06t0354700-01	T	C	W	R	481	0.985612	0.0306122	0.912264	0.777612
	Os06t0354700-01	2
6	14838560	Os06t0358800-01	G	C	E	Q	58	0.981132	0.046729	0.873787	0.876951
6	14841435	Os06t0358800-01	C	T	Q	STOP	277	0.984	0.0304878	0.909376	0.98474
	Os06t0358800-01	2
6	15448157	Os06t0367500-01	G	A	S	F	146	0.980645	0.0655738	0.839148	0.884259
6	15448167	Os06t0367500-01	T	G	I	L	143	0.980519	0.0679012	0.834829	0.880473
6	15452058	Os06t0367500-01	C	A	K	N	65	1	0.031746	0.938462	1
	Os06t0367500-01	3
6	15483211	Os06t0367900-01	T	G	Y	S	522	0.957219	0.0248227	0.869644	0.881147
6	15485401	Os06t0367900-01	A	G	L	D	284	0.987805	0.0378151	0.903073	0.985603
	Os06t0367900-01	2
6	16478922	Os06t0470000-01	A	G	T	A	50	1	0.261745	0.585106	0.965908
6	16479092	Os06t0470000-01	C	T	P	L	76	0.988439	0.034749	0.910014	0.785795
6	16479143	Os06t0470000-01	A	C	E	A	93	0.979167	0.0382775	0.885542	0.8806
	Os06t0470000-01	3
6	16659043	Os06t0473000-01	C	T	A	T	98	0.978261	0.0368098	0.886531	0.982823
	Os06t0473000-01	1
6	16795302	Os06t0474800-01	C	A	G	C	9	0.982036	0.0444444	0.879695	0.982648
	Os06t0474800-01	1
6	16861762	Os06t0475500-01	A	G	L	P	9	0.986842	0.017341	0.939949	1
	Os06t0475500-01	1
6	17758335	Os06t0490000-01	C	T	G	S	20	1	0	1	Fixed
6	17758364	Os06t0490000-01	C	A	R	L	10	1	0	1	Fixed
	Os06t0490000-01	2
6	18099736	LOC_Os06g29900.1	G	T	G	V	68	1	0.0169492	0.966667	1
	LOC_Os06g29900.1	1
6	18190887	Os06t0496000-01	G	T	G	V	56	1	0.0333333	0.935484	1
6	18192244	Os06t0496000-01	C	T	P	L	332	1	0.378092	0.451282	0.789008
	Os06t0496000-01	2
6	18303738	Os06t0497200-00	G	T	E	D	5	1	0.4	0.428571	1
6	18303893	Os06t0497200-00	G	A	R	H	57	1	0.0357143	0.931034	0.999998
6	18303955	Os06t0497200-00	G	T	L	R	78	1	0.0322581	0.9375	1
6	18304604	Os06t0497200-00	G	C	S	T	294	0.947674	0.017301	0.866658	0.86428
	Os06t0497200-00	4
6	18793315	Os06t0504900-00	A	G	F	L	258	0.92	0.0526316	0.752892	0.883086
6	18793434	Os06t0504900-00	A	G	L	S	218	0.966667	0.0384615	0.861587	0.98447
6	18793666	Os06t0504900-00	A	C	Y	D	141	0.75	0.08	0.462259	0.762306
6	18793720	Os06t0504900-00	C	G	V	L	123	1	0.333333	0.5	0.99894
6	18793752	Os06t0504900-00	A	G	V	A	112	1	0.0138889	0.972603	1
	Os06t0504900-00	5
6	19894141	LOC_Os06g32710.1	G	T	P	T	130	1	0.338983	0.493671	0.978802
6	19896023	LOC_Os06g32710.1	T	C	E	G	33	0.676471	0.00938967	0.493719	0.806105
6	19896104	LOC_Os06g32710.1	G	A	T	I	6	0.99187	0.203704	0.645911	0.837496
	LOC_Os06g32710.1	3
6	20373081	LOC_Os06g33460.1	A	C	M	R	156	1	0	1	Fixed
6	20373312	LOC_Os06g33460.1	A	G	L	S	79	1	0.0857143	0.842105	0.982327
	LOC_Os06g33460.1	2
6	20460640	Os06t0527800-01	C	T	V	I	187	0.77305	0.00510204	0.620271	0.918282
6	20460680	Os06t0527800-01	A	T	D	E	173	0.86	0	0.754386	0.884307
6	20461286	Os06t0527800-01	A	G	V	A	98	1	0.00763359	0.984848	1
6	20462239	Os06t0527800-01	T	C	K	E	30	0.918033	0.0454545	0.762409	0.890645
6	20462262	Os06t0527800-01	C	T	R	Q	22	1	0.181818	0.692308	0.889664
	Os06t0527800-01	5
6	20487670	LOC_Os06g33700.1	T	G	F	L	66	1	0.021164	0.958549	1
	LOC_Os06g33700.1	1
6	21055433	Os06t0538400-01	T	C	Y	C	190	1	0	1	Fixed
	Os06t0538400-01	1
6	21629271	Os06t0548200-01	C	G	E	D	215	1	0	1	Fixed
	Os06t0548200-01	1
6	25443741	Os06t0614100-01	C	T	G	E	77	0.987261	0.0411523	0.895845	0.98263
	Os06t0614100-01	1
6	26060048	Os06t0625200-00	A	C	L	R	628	1	0.405109	0.423377	0.961506
6	26060369	Os06t0625200-00	T	A	Q	L	521	1	0.458101	0.371648	0.778254
	Os06t0625200-00	2
6	26838160	Os06t0638700-01	G	C	T	R	170	0.993333	0.00904977	0.96882	1
6	26840070	Os06t0638700-01	C	A	G	V	53	1	0	1	Fixed
	Os06t0638700-01	2
6	26868021	Os06t0639300-01	T	G	S	R	97	1	0.0159363	0.968627	0.745021
6	26869471	Os06t0639300-01	C	T	A	V	232	0.992537	0.00520833	0.974823	1
	Os06t0639300-01	2
6	27040470	Os06t0642650-01	G	A	S	F	144	0.99359	0.333333	0.488107	0.940744
6	27041385	Os06t0642650-01	A	C	S	A	16	0.980392	0	0.961538	0.999984
	Os06t0642650-01	2
6	27512229	Os06t0650700-01	G	A	S	L	26	1	0	1	Fixed
	Os06t0650700-01	1
6	27524525	Os06t0650900-02	C	T	R	Q	54	0.96	0.0151515	0.89329	0.986148
	Os06t0650900-02	1
6	27576444	Os06t0652300-00	C	T	D	N	189	1	0	1	Fixed
6	27576521	Os06t0652300-00	T	G	E	A	163	1	0	1	Fixed
	Os06t0652300-00	2
6	27655077	LOC_Os06g44360.1	C	G	P	R	192	0.92	0	0.851852	0.865202
6	27655136	LOC_Os06g44360.1	G	A	V	I	212	1	0.411765	0.416667	0.788527
6	27655389	LOC_Os06g44360.1	C	T	S	G	288	1	0.395161	0.433526	1
	LOC_Os06g44360.1	3
6	28302247	LOC_Os06g45360.1	C	T	A	T	266	1	0	1	Fixed
6	28302847	LOC_Os06g45360.1	G	A	Q	STOP	144	0.985612	0	0.971631	1
6	28304625	LOC_Os06g45360.1	A	G	S	P	27	1	0	1	Fixed
	LOC_Os06g45360.1	3
6	28307182	Os06t0664200-01	T	C	S	G	168	0.994083	0.00452489	0.979227	1
6	28307209	Os06t0664200-01	G	C	H	D	159	1	0	1	Fixed
	Os06t0664200-01	2
6	28357781	LOC_Os06g45460.1	G	C	R	G	204	1	0.0140845	0.972222	1
	LOC_Os06g45460.1	1
6	30676188	Os06t0705300-02	G	A	R	C	137	0.944134	0	0.89418	0.983412
6	30676693	Os06t0705300-02	T	A	E	D	86	0.954198	0	0.912409	0.986769
	Os06t0705300-02	2
6	30867543	LOC_Os06g49510.1	C	T	G	R	524	0.824645	0	0.701613	0.864965
6	30868025	LOC_Os06g49510.1	G	A	P	L	363	0.892857	0	0.806452	0.896038
6	30868106	LOC_Os06g49510.1	C	T	C	Y	336	0.944444	0.00406504	0.886664	0.982923
	LOC_Os06g49510.1	3
6	31051261	Os06t0712700-01	C	T	E	K	162	0.947368	0	0.9	0.985488
6	31053432	Os06t0712700-01	G	C	T	S	144	0.931034	0	0.870968	0.881797
	Os06t0712700-01	2
6	31361098	Os06t0717400-01	A	G	L	S	126	0.945946	0.00568182	0.88617	0.984029
	Os06t0717400-01	1
6	31694495	Os06t0724900-01	A	G	H	R	3	0.779661	0	0.638889	0.950813
6	31695105	Os06t0724900-01	T	C	I	T	88	0.674556	0	0.508929	0.867618
6	31697786	Os06t0724900-01	G	T	A	S	255	0.634286	0.00727273	0.451103	0.89155
	Os06t0724900-01	3
6	31767906	LOC_Os06g51060.1	G	C	V	L	32	0.983871	0	0.968254	1
6	31768205	LOC_Os06g51060.1	C	G	F	L	131	0.969697	0	0.941176	0.946097
	LOC_Os06g51060.1	2
6	32089592	Os06t0731900-01	C	G	L	V	20	0.990385	0	0.980952	1
	Os06t0731900-01	1
7	332623	LOC_Os07g01530.1	C	T	E	K	397	1	0.384615	0.444444	0.971275
7	332634	LOC_Os07g01530.1	A	C	L	R	393	0.989011	0.378378	0.431054	0.708278
7	332762	LOC_Os07g01530.1	G	C	N	K	350	0.979592	0.5	0.298715	0.753608
7	333126	LOC_Os07g01530.1	A	G	L	P	229	1	0.494505	0.338235	0.915133
7	333301	LOC_Os07g01530.1	T	C	K	E	171	1	0.552448	0.288288	0.721334
7	333447	LOC_Os07g01530.1	T	A	D	V	122	0.974359	0.454545	0.331118	0.723302
	LOC_Os07g01530.1	6
7	748596	LOC_Os07g02290.1	G	A	T	I	455	1	0.405018	0.423469	0.969439
7	751083	LOC_Os07g02290.1	C	A	R	K	346	1	0.157658	0.727626	0.825925
7	751233	LOC_Os07g02290.1	C	A	R	Q	296	1	0.174497	0.702857	0.803321
7	751971	LOC_Os07g02290.1	G	A	P	L	50	1	0.512195	0.322581	0.836753
7	752031	LOC_Os07g02290.1	C	T	R	H	30	1	0.136364	0.76	0.864929
7	752115	LOC_Os07g02290.1	G	C	P	R	2	1	0.405063	0.423423	0.999193
	LOC_Os07g02290.1	6
7	2002103	Os07t0137200-01	T	G	S	A	18	0.580645	0	0.409091	0.985607
	Os07t0137200-01	1
7	3366140	Os07t0162400-01	C	T	E	K	30	1	0.2	0.666667	0.869887
7	3366221	Os07t0162400-01	G	C	P	A	3	1	0.407407	0.421053	0.959137
	Os07t0162400-01	2
7	3375450	Os07t0162500-01	C	T	G	F	75	1	0.529412	0.307692	0.969622
7	3375649	Os07t0162500-01	A	C	S	A	9	1	0.352941	0.478261	0.870436
	Os07t0162500-01	2
7	4224187	LOC_Os07g08220.1	A	C	D	E	132	0.993827	0.0689655	0.858755	0.89532
7	4224255	LOC_Os07g08220.1	T	C	K	E	110	1	0.0719697	0.865724	0.899277
7	4225068	LOC_Os07g08220.1	G	C	T	R	8	0.994083	0.0507812	0.891613	0.994178
	LOC_Os07g08220.1	3
7	5615356	LOC_Os07g10400.1	A	G	N	D	269	1	0.00888889	0.982379	1
7	5619664	LOC_Os07g10400.1	G	A	R	K	717	1	0.0121951	0.975904	1
	LOC_Os07g10400.1	2
7	7988622	LOC_Os07g13920.1	C	A	D	Y	239	1	0.350467	0.480969	0.827712
7	7988781	LOC_Os07g13920.1	C	T	A	T	186	1	0.517241	0.318182	0.799626
7	7989011	LOC_Os07g13920.1	C	T	G	D	109	0.95	0	0.904762	0.996251
7	7989107	LOC_Os07g13920.1	G	T	A	D	77	1	0.166667	0.714286	0.822544
	LOC_Os07g13920.1	4
7	8789546	Os07t0255600-00	T	A	L	Q	18	1	0.166667	0.714286	0.86998
7	8789585	Os07t0255600-00	T	C	M	T	31	1	0.0952381	0.826087	0.907304
7	8789633	Os07t0255600-00	C	T	P	L	47	1	0	1	Fixed
	Os07t0255600-00	3
7	9282038	LOC_Os07g15920.1	G	C	W	C	16	1	0	1	Fixed
7	9282082	LOC_Os07g15920.1	A	C	D	A	31	0.981132	0.05	0.867848	0.837829
7	9282408	LOC_Os07g15920.1	G	A	E	K	140	1	0.423077	0.405405	0.925693
	LOC_Os07g15920.1	3
7	9377073	LOC_Os07g16030.1	T	C	C	R	83	1	0.0178571	0.964912	1
	LOC_Os07g16030.1	1
7	9433203	LOC_Os07g16140.1	G	A	E	K	61	0.993939	0.358268	0.461303	0.818133
7	9435508	LOC_Os07g16140.1	G	A	A	T	201	0.591954	0.00754717	0.406778	0.987508
	LOC_Os07g16140.1	2
7	10344361	LOC_Os07g17470.1	A	C	L	R	122	1	0.0384615	0.925926	0.801394
7	10344629	LOC_Os07g17470.1	G	T	R	S	33	1	0.0273973	0.946667	0.970493
	LOC_Os07g17470.1	2
7	13432937	Os07t0409400-01	G	C	N	K	500	1	0.0576923	0.890909	0.994023
7	13433185	Os07t0409400-01	T	C	K	E	418	0.675676	0	0.510204	0.844222
7	13433482	Os07t0409400-01	T	C	N	D	319	0.689076	0.00480769	0.516635	0.815992
7	13434088	Os07t0409400-01	T	C	T	P	117	0.553571	0.978261	0.251496	0.710441
	Os07t0409400-01	4
7	13842136	LOC_Os07g23390.1	G	T	H	N	193	0.428571	1	0.4	0.799195
7	13842598	LOC_Os07g23390.1	G	T	L	M	39	1	0.333333	0.5	0.964912
7	13842648	LOC_Os07g23390.1	C	T	S	N	22	0.638889	0	0.469388	0.997813
	LOC_Os07g23390.1	3
7	15200046	Os07t0435400-01	C	T	R	K	183	0.431818	0.0119048	0.255341	0.672351
7	15201641	Os07t0435400-01	C	G	E	D	45	1	0.0594059	0.88785	0.993903
	Os07t0435400-01	2
7	15693868	Os07t0443500-00	T	G	L	R	60	0.969466	0.0191083	0.903297	0.995944
	Os07t0443500-00	1
7	17637349	Os07t0472500-01	G	A	M	I	339	0.871795	0.0309278	0.713812	0.834478
7	17638519	Os07t0472500-01	C	G	L	V	437	1	0.412698	0.41573	0.900522
7	17639360	Os07t0472500-01	T	A	S	T	483	1	0.0466321	0.910891	0.996338
7	17639918	Os07t0472500-01	G	A	V	M	556	0.87013	0.0325581	0.708233	0.827724
	Os07t0472500-01	4
7	18060277	Os07t0479100-01	C	T	P	S	9	1	0.0526316	0.9	0.9947
7	18061167	Os07t0479100-01	T	C	V	A	88	0.8	0	0.666667	0.90819
	Os07t0479100-01	2
7	18082067	LOC_Os07g29630.1	T	A	K	I	188	1	0.4	0.428571	0.955359
	LOC_Os07g29630.1	1
7	18099849	LOC_Os07g29660.1	C	G	W	C	48	0.961039	0.0240964	0.878055	0.992932
7	18099974	LOC_Os07g29660.1	A	T	S	T	7	0.972376	0.0189394	0.909109	0.778031
	LOC_Os07g29660.1	2
7	18785852	LOC_Os07g30620.1	G	C	A	G	8	1	0.59375	0.254902	0.811987
7	18785907	LOC_Os07g30620.1	G	T	T	N	192	1	0.571429	0.272727	0.959886
	LOC_Os07g30620.1	2
7	19434384	LOC_Os07g31620.1	T	C	C	R	152	0.956522	0.00900901	0.898848	0.995387
	LOC_Os07g31620.1	1
7	19466872	LOC_Os07g31660.1	A	T	Y	STOP	360	1	0.0131579	0.974026	1
7	19467195	LOC_Os07g31660.1	C	G	A	P	253	1	0	1	Fixed
	LOC_Os07g31660.1	2
7	20392413	LOC_Os07g33030.1	G	T	M	I	137	0.55	1	0.290323	0.803797
7	20392517	LOC_Os07g33030.1	G	A	R	H	172	1	0.0212766	0.958333	0.972399
	LOC_Os07g33030.1	2
7	20617586	Os07t0517500-00	C	T	P	S	66	1	0.5	0.333333	0.985026
	Os07t0517500-00	1
7	21245858	Os07t0527300-00	C	A	F	L	88	0.955056	0.0194175	0.875991	0.993006
7	21246310	Os07t0527300-00	A	G	STOP	W	185	0.930435	0.0104167	0.849405	0.894358
	Os07t0527300-00	2
7	22483393	Os07t0549800-01	T	G	L	V	30	1	0.0566038	0.892857	0.99397
7	22485128	Os07t0549800-01	A	G	S	G	127	1	0.0277778	0.945946	0.999451
	Os07t0549800-01	2
7	22982006	Os07t0558500-01	A	G	L	P	77	1	0.0588235	0.888889	0.993751
	Os07t0558500-01	1
7	24854869	LOC_Os07g40340.1	C	T	G	S	94	1	0.375	0.454545	1
	LOC_Os07g40340.1	1
7	25509955	LOC_Os07g41470.1	T	A	H	L	42	0.755102	0.0645161	0.492948	0.682128
7	25510000	LOC_Os07g41470.1	A	C	V	G	27	1	0.0212766	0.958333	0.972014
	LOC_Os07g41470.1	2
7	25628181	Os07t0607500-01	T	G	E	A	76	1	0.0285714	0.944444	0.970362
	Os07t0607500-01	1
7	26252688	Os07t0619500-02	A	C	T	P	327	1	0	1	Fixed
	Os07t0619500-02	1
7	26303440	Os07t0620300-01	G	C	G	A	239	1	0.0264901	0.948387	0.970932
	Os07t0620300-01	1
7	26312733	Os07t0620600-01	T	C	V	A	43	1	0	1	Fixed
7	26312900	Os07t0620600-01	C	G	R	G	99	1	0.025	0.95122	0.971407
	Os07t0620600-01	2
7	26323765	Os07t0620800-01	T	C	E	G	268	1	0.0144928	0.971429	1
	Os07t0620800-01	1
7	26381154	Os07t0622000-01	T	G	L	V	151	1	0.0203046	0.960199	0.972641
7	26381940	Os07t0622000-01	G	A	V	I	322	1	0.0324324	0.937173	0.999456
	Os07t0622000-01	2
7	26435175	Os07t0623000-01	G	A	A	V	34	1	0.03125	0.939394	0.999491
	Os07t0623000-01	1
7	26547349	LOC_Os07g43190.1	A	C	K	T	112	1	0.0153846	0.969697	1
7	26547406	LOC_Os07g43190.1	A	T	E	V	131	1	0.234043	0.62069	0.87781
7	26547420	LOC_Os07g43190.1	A	T	S	C	136	1	0.0330579	0.936	0.999382
	LOC_Os07g43190.1	3
7	26641045	Os07t0627000-01	G	A	R	H	128	1	0.0322581	0.9375	0.99937
7	26641812	Os07t0627000-01	A	T	N	I	181	1	0.488095	0.344	0.964555
7	26642708	Os07t0627000-01	A	G	R	G	267	1	0.0456432	0.912698	0.996525
	Os07t0627000-01	3
7	26824284	Os07t0631000-01	A	C	D	E	265	1	0.0368852	0.928854	0.998976
	Os07t0631000-01	1
7	26878615	LOC_Os07g43830.1	T	G	E	A	163	1	0.0333333	0.935484	0.99937
	LOC_Os07g43830.1	1
7	27117278	Os07t0636800-01	G	T	H	Q	143	1	0.401163	0.427386	0.972454
	Os07t0636800-01	1
7	27388101	Os07t0642200-01	C	T	A	T	314	1	0.0294118	0.942857	0.969961
	Os07t0642200-01	1
7	29096601	LOC_Os07g47540.1	C	T	V	M	144	1	0	1	Fixed
	LOC_Os07g47540.1	1
7	29106198	LOC_Os07g47570.1	T	C	F	L	21	1	0.0508475	0.903226	0.995487
7	29106888	LOC_Os07g47570.1	A	G	D	G	168	1	0.0646552	0.878543	0.840077
7	29107490	LOC_Os07g47570.1	G	A	E	K	227	0.992857	0.0809249	0.836172	0.907965
7	29108105	LOC_Os07g47570.1	T	G	S	A	308	1	0.0334728	0.935223	0.99931
	LOC_Os07g47570.1	4
7	29135239	Os07t0673550-00	A	C	W	G	19	1	0	1	Fixed
	Os07t0673550-00	1
7	29226911	Os07t0675200-01	C	T	A	V	197	1	0.0212766	0.958333	0.972277
	Os07t0675200-01	1
7	29352714	Os07t0677600-01	C	G	V	L	6	1	0.0460526	0.91195	0.99397
	Os07t0677600-01	1
7	29359440	Os07t0677900-01	A	G	Q	R	65	1	0.0274914	0.946488	0.999566
7	29359674	Os07t0677900-01	A	G	N	S	143	0.85	0.00383142	0.731633	0.874478
7	29359942	Os07t0677900-01	C	A	H	Q	232	1	0.0305085	0.940789	0.9993
7	29360219	Os07t0677900-01	A	G	K	E	325	1	0.020202	0.960396	0.972655
	Os07t0677900-01	4
7	29479461	Os07t0680000-01	T	C	I	V	92	1	0	1	Fixed
7	29479717	Os07t0680000-01	A	C	C	W	6	1	0.0364964	0.929577	0.999009
	Os07t0680000-01	2
7	29537654	Os07t0681200-01	G	T	R	L	70	1	0.537037	0.301205	0.792829
7	29538252	Os07t0681200-01	T	C	M	T	145	1	0	1	Fixed
	Os07t0681200-01	2
7	29579926	Os07t0682000-01	T	A	M	K	6	0.957219	0.00359712	0.910794	0.782611
7	29580135	Os07t0682000-01	A	G	D	G	33	0.989362	0.00316456	0.972639	1
7	29580173	Os07t0682000-01	A	G	N	D	46	0.984456	0.0037594	0.961899	0.971041
	Os07t0682000-01	3
7	29752731	Os07t0685300-01	C	T	A	T	249	0.971014	0.00943396	0.924991	0.999184
7	29752785	Os07t0685300-01	G	A	H	Y	231	0.982609	0.0170455	0.932312	0.999335
7	29753888	Os07t0685300-01	G	A	P	S	28	0.966851	0	0.935829	0.999572
	Os07t0685300-01	3
7	29823920	Os07t0686500-01	A	G	D	G	191*	0.948276	0.0110701	0.879809	0.849235
7	29824235	Os07t0686500-01	G	A	G	D	296	0.972067	0	0.945652	0.971338
7	29826229	Os07t0686500-01	T	C	A	V	338	0.975904	0	0.952941	0.972165
	Os07t0686500-01	3
7	29875337	Os07t0687700-01	T	G	I	M	52	0.907285	0.0052356	0.819968	0.865791
7	29876534	Os07t0687700-01	G	C	G	A	255	0.966851	0.0155642	0.905226	0.995405
	Os07t0687700-01	2
7	30092077	Os07t0691700-01	G	A	G	D	95	0.87218	0.0291262	0.717731	0.843767
7	30092178	Os07t0691700-01	A	G	R	G	129	0.959677	0.0648649	0.801172	0.889643
7	30092922	Os07t0691700-01	G	T	G	V	218	0.95977	0.023622	0.876615	0.993041
7	30093300	Os07t0691700-01	A	G	D	G	344	0.953271	0.0410959	0.83209	0.866614
7	30093668	Os07t0691700-01	A	G	K	E	467	0.873786	0.00316456	0.769636	0.887416
7	30093678	Os07t0691700-01	A	G	K	R	470	0.969388	0.0350318	0.873038	0.845241
7	30094104	Os07t0691700-01	T	A	V	D	612	0.888889	0.0037037	0.792698	0.887193
7	30094371	Os07t0691700-01	G	A	G	E	701	0.87574	0.00829876	0.76271	0.880883
7	30094696	Os07t0691700-01	T	C	Y	H	775	0.977528	0.05	0.860961	0.829971
	Os07t0691700-01	9
7	30243050	Os07t0694600-01	G	C	M	I	33	0.954545	0.0135135	0.886445	0.993911
7	30243102	Os07t0694600-01	C	G	P	A	51	1	0.333333	0.5	0.909867
	Os07t0694600-01	2
8	370706	Os08t0107600-01	T	C	C	R	58	0.984375	0.306931	0.501486	0.784841
8	372023	Os08t0107600-01	A	G	M	V	443	0.994444	0.0133779	0.96255	1
8	372110	Os08t0107600-01	G	C	A	P	472	0.984375	0.0137457	0.942125	1
8	372183	Os08t0107600-01	C	T	T	I	496	0.994505	0.403974	0.414553	1
	Os08t0107600-01	4
8	451133	LOC_Os08g01750.1	T	C	C	R	110	0.977099	0.0331126	0.891204	0.955543
	LOC_Os08g01750.1	1
8	2009847	Os08t0135400-01	A	G	D	G	337	0.941176	0	0.888889	0.963126
	Os08t0135400-01	1
8	2041617	LOC_Os08g04200.1	A	G	M	T	56	0.98	0	0.960784	1
8	2041665	LOC_Os08g04200.1	G	A	A	V	40	0.981132	0.352273	0.444921	0.809454
	LOC_Os08g04200.1	2
8	2174746	Os08t0139000-02	C	T	V	I	82	1	0.0142857	0.971831	1
	Os08t0139000-02	1
8	4299754	Os08t0173600-01	T	C	F	L	21	0.963964	0.0261438	0.879593	0.951343
8	4299872	Os08t0173600-01	C	A	A	D	60	0.976331	0.120833	0.738852	0.914958
8	4300210	Os08t0173600-01	G	A	R	Q	85	0.973856	0.108597	0.753798	0.834567
	Os08t0173600-01	3
8	4545978	LOC_Os08g08020.1	T	C	V	A	2	0.984962	0.026455	0.918856	0.987071
8	4547434	LOC_Os08g08020.1	T	A	L	Q	105	1	0.122093	0.782383	0.874976
8	4547464	LOC_Os08g08020.1	T	C	V	A	115	0.61157	0.0223464	0.400914	0.854487
	LOC_Os08g08020.1	3
8	4610724	Os08t0178800-02	T	C	S	G	71	1	0.503759	0.33	0.991879
8	4610738	Os08t0178800-02	A	G	L	S	66	1	0.505051	0.328859	1
8	4610860	Os08t0178800-02	G	T	H	Q	25	1	0.584615	0.262136	1
	Os08t0178800-02	3
8	5072138	LOC_Os08g08750.1	C	T	G	D	130	1	0.107143	0.806452	0.869345
8	5072445	LOC_Os08g08750.1	A	G	W	R	28	1	0	1	Fixed
	LOC_Os08g08750.1	2
8	5445792	Os08t0193300-00	A	G	M	T	321	0.973684	0.00873362	0.931418	0.988119
8	5445831	Os08t0193300-00	C	T	C	Y	308	1	0.584906	0.261905	1
8	5446258	Os08t0193300-00	T	G	N	H	166	0.936782	0.00671141	0.867802	0.889824
	Os08t0193300-00	3
8	5562809	Os08t0195400-01	A	G	S	P	134	1	0.392523	0.436242	0.79407
8	5562876	Os08t0195400-01	G	T	M	I	42	1	0.504587	0.329268	0.989868
	Os08t0195400-01	2
8	10367814	Os08t0270800-01	C	G	R	G	211	0.985507	0.0284091	0.916214	0.986452
	Os08t0270800-01	1
8	10441968	LOC_Os08g17050.1	C	T	A	T	139	0.994083	0.201878	0.652651	0.829283
8	10442096	LOC_Os08g17050.1	A	G	I	T	96	0.89697	0	0.813187	0.894409
8	10442465	LOC_Os08g17050.1	G	A	S	F	5	0.97351	0.0305344	0.889217	0.962218
	LOC_Os08g17050.1	3
8	10452735	Os08t0272200-00	T	C	M	T	1	0.791045	0	0.654321	0.837287
8	10454282	Os08t0272200-00	G	A	V	M	266	0.966887	0.0191388	0.898403	0.962582
8	10454580	Os08t0272200-00	T	C	V	A	365	0.894366	0.00813008	0.792953	0.877416
8	10454981	Os08t0272200-00	C	G	Q	E	499	0.907514	0.00436681	0.822059	0.894509
	Os08t0272200-00	4
8	11695688	Os08t0290700-01	G	T	G	C	88	0.994253	0.077193	0.845314	0.870195
8	11695754	Os08t0290700-01	C	T	C	R	110	0.993548	0.0501931	0.891625	0.956352
8	11696112	Os08t0290700-01	A	C	D	A	229	0.808917	0	0.679144	0.914711
	Os08t0290700-01	3
8	11862253	Os08t0293100-01	A	C	H	Q	73	1	0.0322581	0.9375	0.988638
	Os08t0293100-01	1
8	14296081	Os08t0324200-01	A	G	S	G	51	1	0	1	Fixed
	Os08t0324200-01	1
8	14695866	Os08t0331000-01	C	T	G	E	51	0.983471	0.00552486	0.956495	1
	Os08t0331000-01	1
8	14797034	LOC_Os08g24370.1	A	C	P	R	461	0.96	0.0315789	0.862027	0.951997
	LOC_Os08g24370.1	1
8	14815910	Os08t0332700-03	C	T	R	Q	405	0.5	0.996656	0.327434	1
8	14816045	Os08t0332700-03	G	A	A	V	360	0.988701	0.0683453	0.849819	0.868878
	Os08t0332700-03	2
8	15193149	LOC_Os08g24930.1	A	G	I	V	9	0.974576	0.0363636	0.880348	0.951635
8	15195927	LOC_Os08g24930.1	G	A	E	N	408	0.38835	1	0.440559	1
	LOC_Os08g24930.1	2
8	16961224	Os08t0364500-00	T	A	H	Q	58	0.967213	0	0.936508	1
	Os08t0364500-00	1
8	19519364	LOC_Os08g31410.7	T	G	S	A	471	0.989744	0	0.979695	1
	LOC_Os08g31410.7	1
8	19698827	Os08t0409500-01	C	T	S	L	61	0.944444	0.483333	0.260247	0.542942
8	19699223	Os08t0409500-01	A	G	N	S	193	0.909091	0	0.833333	0.857295
8	19699897	Os08t0409500-01	G	C	V	L	418	1	0	0.978947	0.938161
	Os08t0409500-01	3
8	20109705	Os08t0418600-01	T	A	L	Q	131	0.970149	0.0206186	0.901685	0.985282
	Os08t0418600-01	1
8	20120229	Os08t0419000-01	A	G	T	A	15	0.973684	0.0131579	0.922771	0.813603
8	20120425	Os08t0419000-01	A	T	K	M	80	1	0	0.971014	0.938161
	Os08t0419000-01	2
8	20911931	Os08t0430700-01	C	G	G	P	152	1	0.018018	0.964602	1
8	20912751	Os08t0430700-01	G	A	S	F	7	1	0.0465116	0.911111	1
	Os08t0430700-01	2
8	21306972	Os08t0436700-01	A	G	T	A	93	0.943089	0.00462963	0.883121	0.954602
	Os08t0436700-01	1
8	21691849	Os08t0443400-00	C	T	V	M	246	1	0	0.96	0.938161
8	21692089	Os08t0443400-00	G	A	P	S	166	1	0.512821	0.322034	0.9632
8	21692508	Os08t0443400-00	A	G	L	P	26	1	0	0.894737	0.938161
	Os08t0443400-00	3
8	22105135	Os08t0451000-01	A	G	T	A	184	1	0	1	Fixed
8	22107468	Os08t0451000-01	G	A	V	I	445	1	0.004	0.992032	0.999669
8	22111060	Os08t0451000-01	T	C	V	A	665	0.977099	0	0.955224	0.703109
	Os08t0451000-01	3
8	22143122	LOC_Os08g35010.1	T	A	H	L	148	1	0	1	Fixed
8	22144457	LOC_Os08g35010.1	A	G	L	S	97	1	0	1	Fixed
	LOC_Os08g35010.1	2
8	22363700	LOC_Os08g35300.1	C	T	A	V	56	1	0	1	Fixed
8	22363897	LOC_Os08g35300.1	A	G	M	V	122	1	0	1	Fixed
8	22363981	LOC_Os08g35300.1	C	T	P	S	150	1	0.00398406	0.992063	0.999669
8	22364164	LOC_Os08g35300.1	C	T	R	C	211	1	0	0.989305	0.938161
	LOC_Os08g35300.1	4
8	22496847	Os08t0457100-01	T	C	I	T	100	1	0	0.962963	0.938161
	Os08t0457100-01	1
8	22552490	Os08t0458200-01	T	C	L	P	177	0.95625	0.00704225	0.902211	0.81431
8	22552656	Os08t0458200-01	G	C	E	D	232	0.982036	0	0.964706	0.999995
	Os08t0458200-01	2
8	22618573	Os08t0459300-02	C	G	G	R	156	1	0.0129032	0.974522	1
	Os08t0459300-02	1
8	22641756	Os08t0459700-00	T	C	Q	R	84	1	0	1	Fixed
	Os08t0459700-00	1
8	22724834	LOC_Os08g35880.1	G	A	R	STOP	382	1	0.00413223	0.99177	0.999666
8	22725854	LOC_Os08g35880.1	G	A	A	V	185	1	0	0.989744	0.938161
8	22726043	LOC_Os08g35880.1	A	C	L	R	115	1	0	1	Fixed
	LOC_Os08g35880.1	3
8	22790731	Os08t0462700-01	G	C	G	A	81	1	0.047619	0.909091	0.963126
	Os08t0462700-01	1
8	22897447	Os08t0464400-01	C	A	D	E	125	1	0	1	Fixed
	Os08t0464400-01	1
8	23072286	Os08t0467300-01	G	A	V	I	304	1	0	1	Fixed
	Os08t0467300-01	1
8	23236670	Os08t0470700-00	G	A	A	V	153	1	0.0534351	0.898551	0.95955
	Os08t0470700-00	1
8	23295535	LOC_Os08g36750.1	A	T	R	STOP	54	1	0.0615385	0.884058	0.956565
8	23295561	LOC_Os08g36750.1	A	C	R	S	62	1	0.0658436	0.876448	0.90376
8	23295641	LOC_Os08g36750.1	G	A	S	N	89	1	0.0820513	0.848341	0.891381
8	23295773	LOC_Os08g36750.1	G	A	R	H	133	1	0.0724638	0.864865	0.900021
8	23295881	LOC_Os08g36750.1	A	T	D	V	169	1	0.0428571	0.917808	0.986772
	LOC_Os08g36750.1	5
8	23310620	Os08t0471900-01	A	G	M	T	218	1	0.0347826	0.932773	1
8	23310635	Os08t0471900-01	C	T	R	K	213	1	0.0555556	0.894737	0.95725
	Os08t0471900-01	2
8	23496806	Os08t0475000-00	A	G	V	A	274	1	0	0.979381	0.938161
8	23496971	Os08t0475000-00	C	T	R	K	219	1	0	0.942857	0.938161
8	23497017	Os08t0475000-00	T	C	M	V	204	1	0	1	Fixed
8	23497526	Os08t0475000-00	G	C	A	G	37	1	0.0740741	0.862069	0.888605
	Os08t0475000-00	4
8	23499891	Os08t0475100-01	T	G	E	A	318	1	0	1	Fixed
	Os08t0475100-01	1
8	23507371	Os08t0475400-01	A	G	I	M	182	1	0	0.931034	0.938161
	Os08t0475400-01	1
8	23909241	LOC_Os08g37600.1	C	T	V	I	485	1	0.0246914	0.951807	1
	LOC_Os08g37600.1	1
8	26062417	LOC_Os08g41090.1	A	C	S	R	93	1	0.00892857	0.982301	1
8	26062876	LOC_Os08g41090.1	G	T	T	N	4	0.99359	0.0119522	0.963642	1
	LOC_Os08g41090.1	2
8	26065266	Os08t0522500-01	T	C	S	G	34	1	0.0243902	0.952381	1
	Os08t0522500-01	1
8	26304578	LOC_Os08g41500.1	G	A	R	Q	140	1	0.278226	0.564669	1
8	26305507	LOC_Os08g41500.1	A	G	T	A	186	0.933775	0	0.875776	0.952546
	LOC_Os08g41500.1	2
8	26389319	LOC_Os08g41650.1	C	T	S	F	76	1	0.432432	0.396226	0.951794
8	26389508	LOC_Os08g41650.1	T	C	L	P	139	0.897959	0	0.814815	0.895444
	LOC_Os08g41650.1	2
8	26430569	Os08t0529100-01	T	C	V	A	6	0.967742	0	0.9375	0.988638
8	26431339	Os08t0529100-01	A	G	T	A	71	0.89781	0	0.81457	0.865197
	Os08t0529100-01	2
8	27207330	Os08t0541800-00	C	A	L	I	175	1	0.49635	0.336585	1
	Os08t0541800-00	1
8	27245324	Os08t0542700-01	C	T	T	M	32	1	0	1	Fixed
	Os08t0542700-01	1
8	27257486	LOC_Os08g42990.1	G	A	A	V	249	0.995261	0	0.990566	0.999659
8	27257515	LOC_Os08g42990.1	A	T	S	R	239	0.994764	0	0.989583	0.999651
	LOC_Os08g42990.1	2
8	27393697	Os08t0544900-01	T	C	V	A	387	1	0.0510204	0.902913	0.964929
	Os08t0544900-01	1
8	27455726	Os08t0546400-01	T	C	N	S	302	1	0.0490566	0.906475	0.962949
	Os08t0546400-01	1
8	27601017	Os08t0548500-01	C	T	A	V	538	1	0	1	Fixed
	Os08t0548500-01	1
8	27756461	Os08t0552500-00	C	G	H	D	41	1	0	1	Fixed
8	27756843	Os08t0552500-00	C	A	T	K	168	1	0.445255	0.383838	0.82833
	Os08t0552500-00	2
8	27774433	LOC_Os08g43950.1	G	A	R	H	4	1	0	1	Fixed
	LOC_Os08g43950.1	1
8	27782352	LOC_Os08g43980.1	T	C	I	T	125	1	0.429752	0.398844	0.919565
8	27782534	LOC_Os08g43980.1	T	A	C	S	186	1	0	1	Fixed
8	27782697	LOC_Os08g43980.1	T	C	I	T	240	1	0	1	Fixed
	LOC_Os08g43980.1	3
8	27783795	Os08t0553900-00	C	A	Q	K	69	1	0.41806	0.410377	0.973315
	Os08t0553900-00	1
8	27793799	Os08t0554000-02	C	T	T	I	227	1	0.32	0.515152	0.788905
8	27794680	Os08t0554000-02	G	A	D	N	339	1	0	1	Fixed
	Os08t0554000-02	2
8	27900157	LOC_Os08g44180.1	A	G	T	A	171	0.993056	0.00471698	0.976818	1
8	27902322	LOC_Os08g44180.1	G	A	G	E	356	1	0.00480769	0.990431	0.999649
	LOC_Os08g44180.1	2
8	27913752	Os08t0556000-01	G	C	D	E	547	1	0	1	Fixed
8	27914708	Os08t0556000-01	G	C	T	R	311	0.993007	0.00465116	0.976853	1
	Os08t0556000-01	2
8	28104653	LOC_Os08g44560.1	A	G	M	V	197	1	0.0311111	0.939655	1
	LOC_Os08g44560.1	1
8	28399502	LOC_Os08g45090.1	C	T	A	T	110	1	0	1	Fixed
	LOC_Os08g45090.1	1
9	421599	LOC_Os09g01660.1	A	T	F	I	42	1	0.0188679	0.962963	1
	LOC_Os09g01660.1	1
9	940746	Os09t0111800-02	C	T	V	I	184	1	0.394737	0.433962	1
9	941474	Os09t0111800-02	A	G	C	R	123	0.965517	0.0110294	0.911548	0.774019
	Os09t0111800-02	2
9	1486777	LOC_Os09g03200.1	A	C	E	A	32	1	0.0618557	0.883495	0.861577
9	1486824	LOC_Os09g03200.1	G	A	V	I	48	1	0.0126582	0.975	1
	LOC_Os09g03200.1	2
9	2459437	Os09t0133200-01	C	G	M	I	223	1	0.0319635	0.938053	1
	Os09t0133200-01	1
9	3482334	LOC_Os09g06230.1	G	A	S	L	196	1	0.0326531	0.936759	1
9	3485802	LOC_Os09g06230.1	A	G	S	P	26	0.935065	0.00653595	0.865117	0.852415
	LOC_Os09g06230.1	2
9	3704903	Os09t0241550-00	A	C	N	T	38	1	0.447619	0.381579	0.806786
9	3705168	Os09t0241550-00	G	C	E	D	126	1	0.046875	0.910448	0.994531
	Os09t0241550-00	2
9	3939134	Os09t0244900-03	G	A	R	H	105	1	0.0352423	0.931915	1
	Os09t0244900-03	1
9	4298728	Os09t0249000-01	G	T	A	F	213	1	0	1	Fixed
	Os09t0249000-01	1
9	4518656	Os09t0251800-01	T	G	V	G	19	1	0.0135747	0.973214	1
	Os09t0251800-01	1
9	4841525	Os09t0256600-00	T	C	T	A	102	1	0.0337838	0.934641	1
9	4841729	Os09t0256600-00	C	T	G	S	34	1	0.0583333	0.889764	0.852574
	Os09t0256600-00	2
9	5653510	Os09t0267300-01	T	G	N	T	66	1	0.0699708	0.86921	0.848254
9	5653653	Os09t0267300-01	G	T	C	STOP	18	1	0.0138889	0.972603	1
	Os09t0267300-01	2
9	6599958	Os09t0281800-01	T	C	V	A	180	1	0.380952	0.448276	0.99783
	Os09t0281800-01	1
9	7585281	Os09t0294300-01	G	A	T	I	125	1	0.00369004	0.992647	0.999634
	Os09t0294300-01	1
9	7659819	LOC_Os09g12400.1	G	A	S	F	239	1	0.165919	0.715385	0.948358
9	7659987	LOC_Os09g12400.1	C	G	S	T	183	1	0.487973	0.344111	0.970477
9	7660029	LOC_Os09g12400.1	T	C	Y	C	169	1	0.00393701	0.992157	0.999629
9	7660162	LOC_Os09g12400.1	G	A	L	F	125	0.993865	0.471545	0.348252	0.999997
9	7660224	LOC_Os09g12400.1	A	C	V	G	104	1	0.532319	0.305211	0.797324
	LOC_Os09g12400.1	5
9	9255631	LOC_Os09g14660.1	C	T	V	M	400	0.752809	0.185315	0.323288	0.518137
9	9255933	LOC_Os09g14660.1	G	A	T	I	299	1	0.312727	0.523546	1
9	9255955	LOC_Os09g14660.1	A	G	Y	H	292	1	0.2827	0.559211	0.84229
9	9256628	LOC_Os09g14660.1	C	A	E	D	140	0.75	0.2	0.303258	0.506744
9	9257086	LOC_Os09g14660.1	G	A	S	F	91	1	0.287449	0.553459	0.842904
	LOC_Os09g14660.1	5
9	12857902	Os09t0369400-01	C	A	S	R	305	1	0.0574713	0.891304	0.992229
	Os09t0369400-01	1
9	13021644	LOC_Os09g20600.1	T	C	V	A	41	1	0	1	Fixed
	LOC_Os09g20600.1	1
9	13385907	LOC_Os09g21180.1	G	A	T	A	171	1	0.037037	0.928571	1
9	13387696	LOC_Os09g21180.1	T	C	R	C	228	1	0	1	Fixed
	LOC_Os09g21180.1	2
9	14144612	LOC_Os09g22430.1	G	T	R	L	244	0.955357	0.00460829	0.905374	0.993233
	LOC_Os09g22430.1	1
9	15049111	Os09t0407900-01	C	T	E	K	489	0.994975	0.0183824	0.953903	1
9	15052856	Os09t0407900-01	T	C	I	V	26	0.894737	0	0.809524	0.909973
	Os09t0407900-01	2
9	15550160	Os09t0416500-01	T	A	D	E	19	1	0	1	Fixed
9	15554718	Os09t0416500-01	T	G	N	K	155	0.994152	0	0.988372	1
	Os09t0416500-01	2
9	15610914	LOC_Os09g25030.1	T	G	L	V	13	1	0.00588235	0.988304	1
9	15611257	LOC_Os09g25030.1	G	A	G	E	30	1	0.237288	0.616438	0.886236
9	15611302	LOC_Os09g25030.1	C	T	P	L	45	1	0.274725	0.568966	0.892382
9	15611351	LOC_Os09g25030.1	C	A	S	R	61	1	0.213333	0.648352	0.946451
	LOC_Os09g25030.1	4
9	15663449	Os09t0418000-01	C	T	R	Q	313	1	0.572816	0.271605	0.991723
9	15663623	Os09t0418000-01	A	G	V	A	255	1	0.405405	0.423077	0.927637
	Os09t0418000-01	2
9	16040247	Os09t0424300-01	A	G	L	S	141	1	0.00340136	0.99322	0.999639
	Os09t0424300-01	1
9	16928558	Os09t0439200-01	T	G	E	D	89	1	0	1	Fixed
	Os09t0439200-01	1
9	17068815	Os09t0441900-01	T	A	L	H	228	1	0.00401606	0.992	1
9	17069102	Os09t0441900-01	T	A	C	S	324	1	0.00649351	0.987097	1
	Os09t0441900-01	2
9	17506127	LOC_Os09g27690.1	C	T	P	S	56	1	0.00869565	0.982759	1
9	17506225	LOC_Os09g27690.1	C	A	D	E	88	1	0.015625	0.969231	1
	LOC_Os09g27690.1	2
9	17588579	Os09t0451500-02	A	G	K	R	331	1	0.00469484	0.990654	1
9	17589303	Os09t0451500-02	C	T	P	S	411	1	0.516807	0.31856	0.83679
	Os09t0451500-02	2
9	17957732	Os09t0457800-01	C	G	T	R	184	1	0.0126582	0.975	1
	Os09t0457800-01	1
9	18011033	LOC_Os09g28540.1	T	A	Q	H	19	1	0.580357	0.265537	0.967493
	LOC_Os09g28540.1	1
9	18022505	Os09t0459600-01	A	T	H	Q	282	1	0.00446429	0.991111	1
	Os09t0459600-01	1
9	18078448	Os09t0460700-01	C	A	A	D	51	1	0.0103093	0.979592	1
	Os09t0460700-01	1
9	18219218	Os09t0463900-00	A	G	R	G	13	1	0	1	Fixed
9	18219440	Os09t0463900-00	G	A	M	I	60	1	0.469231	0.361257	1
9	18219598	Os09t0463900-00	G	A	R	K	113	1	0	1	Fixed
9	18219742	Os09t0463900-00	A	T	D	V	161	1	0	1	Fixed
	Os09t0463900-00	4
9	18301390	Os09t0465500-01	G	A	R	Q	210	1	0.0046729	0.990698	1
9	18301401	Os09t0465500-01	A	G	N	D	214	1	0.00487805	0.990291	1
	Os09t0465500-01	2
9	18389174	LOC_Os09g29170.2	T	A	S	C	350	1	0.00377358	0.992481	1
9	18391788	LOC_Os09g29170.2	G	A	S	F	22	1	0.363636	0.466667	0.99783
	LOC_Os09g29170.2	2
9	18476708	LOC_Os09g29350.1	A	C	C	G	87	1	0.0166667	0.967213	1
	LOC_Os09g29350.1	1
9	18535676	LOC_Os09g29430.1	T	C	S	P	31	1	0.0227273	0.955556	0.994829
9	18535736	LOC_Os09g29430.1	C	T	L	F	51	1	0.596154	0.253012	0.895746
9	18535751	LOC_Os09g29430.1	C	T	L	F	56	1	0.0660377	0.876106	0.891273
9	18535826	LOC_Os09g29430.1	A	G	T	A	81	1	0.0285714	0.944444	1
	LOC_Os09g29430.1	4
9	19019342	Os09t0479100-01	T	C	V	A	59	1	0.568345	0.275229	1
9	19019414	Os09t0479100-01	C	T	S	P	96	0.913706	0	0.841121	0.869038
9	19020219	Os09t0479100-01	A	G	G	D	217	1	0.58296	0.263456	0.938459
9	19020266	Os09t0479100-01	C	A	H	N	404	0.946108	0.428571	0.311586	0.610144
	Os09t0479100-01	4
9	19218674	Os09t0482700-00	T	C	V	A	22	1	0.020339	0.960133	0.942917
9	19219066	Os09t0482700-00	C	G	Q	E	153	1	0.0284553	0.944664	1
	Os09t0482700-00	2
9	19296787	LOC_Os09g30510.1	A	C	STOP	G	272	1	0.02	0.960784	0.7372
9	19296983	LOC_Os09g30510.1	C	G	K	N	206	1	0.0180723	0.964497	1
9	19297156	LOC_Os09g30510.1	C	T	A	T	149	1	0.0192308	0.962264	1
9	19297365	LOC_Os09g30510.1	G	A	A	V	79	1	0.00613497	0.987805	1
	LOC_Os09g30510.1	4
9	19405720	Os09t0485800-01	A	G	N	S	140	1	0.00534759	0.989362	1
	Os09t0485800-01	1
9	19460821	Os09t0487700-01	A	G	Q	R	78	0.950276	0	0.905263	0.993719
9	19461025	Os09t0487700-01	C	T	S	L	146	1	0.133333	0.764706	0.899853
	Os09t0487700-01	2
9	19771225	Os09t0493500-01	C	T	V	I	169	1	0.0118343	0.976608	1
	Os09t0493500-01	1
9	19895094	LOC_Os09g32240.1	C	A	G	V	203	1	0.00609756	0.987879	1
	LOC_Os09g32240.1	1
9	19899882	Os09t0497700-01	C	A	T	K	101	1	0.569106	0.274611	1
9	19901296	Os09t0497700-01	C	T	T	I	218	1	0.51417	0.320856	0.846588
9	19902168	Os09t0497700-01	G	A	E	K	341	1	0.569832	0.274021	1
	Os09t0497700-01	3
9	19923905	LOC_Os09g32280.1	T	G	N	K	252	1	0.00462963	0.990783	1
	LOC_Os09g32280.1	1
9	20052795	Os09t0501200-01	T	C	V	A	2*	1	0.00877193	0.982609	1
	Os09t0501200-01	1
9	20109536	LOC_Os09g32600.1	T	C	Q	R	258	0.994737	0	0.989529	1
9	20109710	LOC_Os09g32600.1	C	T	R	H	200	1	0.00374532	0.992537	1
9	20109746	LOC_Os09g32600.1	T	G	Y	S	188	1	0.00340136	0.99322	1
9	20109867	LOC_Os09g32600.1	C	G	V	L	147	1	0.146758	0.744048	0.876809
9	20110004	LOC_Os09g32600.1	C	T	R	H	102	1	0.580537	0.265393	0.934392
	LOC_Os09g32600.1	5
9	20132853	LOC_Os09g32660.1	C	T	G	S	165	1	0.0078125	0.984496	1
9	20132935	LOC_Os09g32660.1	G	T	D	E	137	1	0.161404	0.722054	0.847352
9	20133584	LOC_Os09g32660.1	A	G	M	T	1	1	0.0115607	0.977143	1
	LOC_Os09g32660.1	3
9	20263149	LOC_Os09g32890.1	C	A	L	R	58	1	0.344828	0.487179	0.783565
9	20263326	LOC_Os09g32890.1	C	T	D	N	92	1	0.353659	0.477477	0.819722
9	20263427	LOC_Os09g32890.1	A	C	E	STOP	151	1	0.0434783	0.916667	0.994923
	LOC_Os09g32890.1	3
9	20310035	Os09t0507200-01	C	G	F	L	73	1	0.00645161	0.987179	1
	Os09t0507200-01	1
9	20521927	LOC_Os09g33640.1	A	G	I	V	30	1	0	1	Fixed
	LOC_Os09g33640.1	1
9	20597244	Os09t0512700-01	G	A	C	Y	9	1	0.0943396	0.827586	0.908247
9	20597291	Os09t0512700-01	G	A	A	T	25	1	0.0434783	0.916667	0.994923
9	20597417	Os09t0512700-01	C	G	L	V	67	1	0.0240964	0.952941	0.942732
9	20601749	Os09t0512700-01	T	A	C	S	359	0.994048	0.0661765	0.864079	0.842973
	Os09t0512700-01	4
9	20609640	Os09t0512900-02	T	C	L	P	13	1	0.0168067	0.966942	1
9	20611066	Os09t0512900-02	G	C	R	P	201	1	0.0128205	0.974684	1
	Os09t0512900-02	2
9	20732681	Os09t0515500-01	A	G	D	G	40	1	0.00865801	0.982833	1
9	20733714	Os09t0515500-01	A	G	I	V	202	1	0.00772201	0.984674	1
	Os09t0515500-01	2
9	20895706	LOC_Os09g34290.1	A	T	S	T	135	1	0.0892019	0.836207	0.91265
9	20896684	LOC_Os09g34290.1	T	C	Q	R	11	1	0.0121457	0.976	1
	LOC_Os09g34290.1	2
9	21138376	Os09t0522000-01	T	C	N	D	143	1	0	1	Fixed
	Os09t0522000-01	1
9	21607065	Os09t0530300-01	A	C	E	D	333	1	0.0714286	0.866667	0.909973
9	21607081	Os09t0530300-01	A	G	T	A	339	1	0.0526316	0.9	0.88504
9	21607489	Os09t0530300-01	A	C	M	L	474	1	0.385965	0.443038	1
	Os09t0530300-01	3
9	21989484	Os09t0537700-01	T	C	T	A	17	1	0.305556	0.531915	0.964864
	Os09t0537700-01	1
9	22006562	LOC_Os09g36720.1	C	T	P	L	24	1	0.265403	0.580524	0.90315
9	22006762	LOC_Os09g36720.1	G	A	G	R	91	1	0.246914	0.60396	0.978212
	LOC_Os09g36720.1	2
9	22372866	Os09t0544900-01	T	G	H	P	113	0.94964	0.0049505	0.894283	0.992777
	Os09t0544900-01	1
9	22486544	Os09t0547800-01	A	G	I	V	357	1	0.041841	0.919679	0.994715
	Os09t0547800-01	1
9	22577470	Os09t0549600-00	T	C	L	P	196	1	0.0333333	0.935484	1
	Os09t0549600-00	1
9	22715110	Os09t0552300-01	C	T	V	A	106	0.989529	0.00327869	0.97274	1
9	22715241	Os09t0552300-01	A	G	G	R	150	1	0.103896	0.811765	0.890721
	Os09t0552300-01	2
9	22760799	LOC_Os09g38050.1	A	C	Y	S	150	1	0.00591716	0.988235	1
	LOC_Os09g38050.1	1
9	22840314	Os09t0555100-00	T	G	S	A	195	1	0.0078125	0.984496	1
9	22841675	Os09t0555100-00	T	A	L	I	399	1	0.010989	0.978261	1
	Os09t0555100-00	2
9	22870959	Os09t0555400-01	A	G	F	S	437	0.995122	0.00626959	0.977831	1
	Os09t0555400-01	1
9	22986505	Os09t0557400-01	C	T	V	A	27	1	0.0360825	0.930348	1
9	22987141	Os09t0557400-01	A	G	R	K	177	1	0	1	Fixed
	Os09t0557400-01	2
9	23374102	Os09t0565700-01	G	A	A	T	33	1	0	1	Fixed
	Os09t0565700-01	1
9	23559539	Os09t0569450-01	C	T	P	L	18	1	0.0117647	0.976744	1
	Os09t0569450-01	1
9	23759612	Os09t0573100-01	A	T	F	I	122	1	0.0127389	0.974843	1
	Os09t0573100-01	1
10	1115956	LOC_Os10g02830.1	A	G	L	P	10	0.611111	0	0.44	0.984004
	LOC_Os10g02830.1	1
10	1680780	Os10t0126800-01	A	T	I	N	328	1	0.032491	0.937063	0.999384
10	1680849	Os10t0126800-01	T	C	H	R	305	1	0.0452489	0.91342	0.779938
10	1680874	Os10t0126800-01	C	T	V	M	297	1	0.0411523	0.920949	0.791281
10	1681186	Os10t0126800-01	A	G	Y	H	193	1	0.0762712	0.858268	0.867737
10	1681198	Os10t0126800-01	A	C	S	A	189	1	0.0243902	0.952381	0.998957
10	1681210	Os10t0126800-01	T	C	I	V	185	0.974194	0.0340909	0.883854	0.873999
[truncated: 403 more rows]
