# Supplementary material for: Whole-Genome Analysis Revealed the Positively Selected Genes during the Differentiation of indica and Temperate japonica Rice
Source: PLoS One. 2015 Mar 16;10(3):e0119239. doi: 10.1371/journal.pone.0119239 (PMC4361536; doi:10.1371/journal.pone.0119239)
Supplement: S7 Table — (XLSX) [file pone.0119239.s007.xlsx]

## Sheet: Sheet1
Table S7. The genes that were selected as PSGs contained one synonymous site or nonsense mutant site.
Chromosome	Gene-ID	Position on the Chromosome	Nipponbare allele	other allele	Nipponbare amino acid	Changed amino acid	position in the protein	Allele frequency in TEJ	Allele frequency in IND	Fst	P (Simul Fst<sample Fst)
1	LOC_Os01g11760.1	6364197	C	G	A	G	52	1	0.484848	0.346939	0.972255
1	LOC_Os01g11760.1	6364550	A	C	N	K	137	0.920635	0.204348	0.521209	0.690122
1	LOC_Os01g11760.1	6365830	G	T	A	A	346	1	0.45	0.37931	0.749367
LOC_Os01g11760.1	3
1	LOC_Os01g31480.1	18880503	T	C	S	P	4	0.97619	0.108696	0.758009	0.837623
1	LOC_Os01g31480.1	18880724	A	G	N	S	45	0.97619	0.010929	0.931884	0.997661
1	LOC_Os01g31480.1	18880762	G	A	A	T	58	0.987805	0.138298	0.733323	0.905854
1	LOC_Os01g31480.1	18880801	G	A	A	T	71	0.953488	0.163934	0.632111	0.804095
1	LOC_Os01g31480.1	18880872	T	C	A	A	94	0.955224	0.00952381	0.895461	0.97028
1	LOC_Os01g31480.1	18880961	C	T	S	L	124	0.981132	0.0366972	0.892241	0.968463
1	LOC_Os01g31480.1	18881815	T	G	S	A	154	0.975309	0	0.951807	0.980044
LOC_Os01g31480.1	7
1	LOC_Os01g36740.1	22065564	G	A	T	M	181	1	0.341667	0.490683	0.932519
1	LOC_Os01g36740.1	22065896	A	G	P	P	92	1	0.463918	0.366197	0.76613
1	LOC_Os01g36740.1	22066142	G	T	H	N	54	1	0.318519	0.516854	0.978659
LOC_Os01g36740.1	3
1	Os01t0638000-01	27354476	T	C	D	D	28	0.77193	0.00980392	0.609891	0.790882
1	Os01t0638000-01	27355026	T	A	L	I	212	0.782051	0.0198675	0.604648	0.802556
1	Os01t0638000-01	27355200	G	C	D	H	270	1	0	1	Fixed
Os01t0638000-01	3
1	LOC_Os01g47390.1	28832394	C	T	V	V	7	1	0	1	Fixed
1	LOC_Os01g47390.1	28832530	C	T	R	C	53	1	0.01	0.980198	1
LOC_Os01g47390.1	2
1	Os01t0755500-01	33455497	T	C	S	P	4	0.992754	0	0.985612	1
1	Os01t0755500-01	33455820	A	C	E	D	111	0.833333	0	0.714286	0.886579
1	Os01t0755500-01	33456738	C	T	A	A	417	1	0.5625	0.28	1
Os01t0755500-01	3
2	Os02t0118000-01	939012	C	G	V	L	327	1	0.0983607	0.820896	0.888686
2	Os02t0118000-01	939406	A	G	I	I	195	1	0.107317	0.806167	0.871645
2	Os02t0118000-01	939845	A	G	V	A	49	0.980892	0.0367647	0.891654	0.962909
Os02t0118000-01	3
2	Os02t0203700-01	5800211	A	G	V	A	123	1	0	1	Fixed
2	Os02t0203700-01	5800261	A	G	D	D	106	0.348837	1	0.482759	0.73679
Os02t0203700-01	2
2	Os02t0654000-01	27269845	A	G	E	G	46	0.992647	0.0252525	0.936152	0.996822
2	Os02t0654000-01	27271017	C	T	V	V	136	0.993103	0.393305	0.422902	0.946269
Os02t0654000-01	2
3	Os03t0148300-00	2674334	G	C	T	R	180	1	0.0140845	0.972222	1
3	Os03t0148300-00	2674650	T	G	Q	P	105	1	0	1	Fixed
3	Os03t0148300-00	2674663	G	T	R	R	101	1	0.0526316	0.9	0.946368
Os03t0148300-00	3
3	Os03t0255100-01	8247317	G	A	S	S	912	0.586592	1	0.260563	1
3	Os03t0255100-01	8247438	T	G	Q	P	872	0.525773	0	0.356643	0.759464
3	Os03t0255100-01	8248652	C	T	V	I	678	0.988235	0.0116279	0.953762	0.706723
3	Os03t0255100-01	8249039	T	C	I	V	624	0.549669	0	0.378995	0.823823
3	Os03t0255100-01	8249659	T	C	T	A	494	0.989305	0.0103806	0.958293	0.99288
Os03t0255100-01	5
3	LOC_Os03g15090.1	8298370	G	A	E	K	32	1	0.0105263	0.979167	1
3	LOC_Os03g15090.1	8298558	G	A	E	E	94	0.340426	1	0.492063	0.834292
3	LOC_Os03g15090.1	8298736	A	T	R	W	156	1	0.291667	0.548387	0.994421
LOC_Os03g15090.1	3
3	LOC_Os03g19660.1	11106849	C	T	M	T	16	0.981132	0	0.962963	0.995468
3	LOC_Os03g19660.1	11106903	C	A	S	STOP	29	0.974359	0	0.95	1
3	LOC_Os03g19660.1	11106994	G	A	Q	Q	59	1	0	1	Fixed
3	LOC_Os03g19660.1	11107054	C	T	S	S	79	0.982759	0.428571	0.369669	0.748421
3	LOC_Os03g19660.1	11108091	T	C	D	D	127	0.947368	0	0.9	0.818325
LOC_Os03g19660.1	5
3	Os03t0314700-01	11323074	C	T	S	S	122	1	0.54386	0.295455	0.754509
3	Os03t0314700-01	11323183	C	A	P	T	159	0.945652	0	0.896907	0.973139
Os03t0314700-01	2
3	Os03t0366800-00	14894258	G	A	L	L	212	1	0	1	Fixed
3	Os03t0366800-00	14894423	G	T	P	T	157	1	0	1	Fixed
Os03t0366800-00	2
3	LOC_Os03g26380.1	15629342	G	A	P	L	400	0.222222	1	0.636364	0.813183
3	LOC_Os03g26380.1	15630303	G	A	S	L	202	1	0.181818	0.692308	0.89338
3	LOC_Os03g26380.1	15630460	T	C	P	P	176	1	0.6	0.25	0.746741
3	LOC_Os03g26380.1	15631529	G	A	P	L	22	1	0.413793	0.414634	0.955684
LOC_Os03g26380.1	4
3	LOC_Os03g30700.1	18123895	C	T	Q	STOP	17	1	0.012931	0.974468	0.996066
3	LOC_Os03g30700.1	18125344	A	G	T	A	28	0.955556	0.0178571	0.8799	0.938851
3	LOC_Os03g30700.1	18125542	A	C	I	L	94	0.942857	0.0266667	0.840185	0.877029
3	LOC_Os03g30700.1	18125601	C	T	L	L	113	1	0.0143541	0.971698	1
3	LOC_Os03g30700.1	18125709	C	G	R	R	149	1	0.0122699	0.975758	0.995263
3	LOC_Os03g30700.1	18126352	C	T	P	S	364	1	0	1	0.975465
LOC_Os03g30700.1	6
4	LOC_Os04g13050.1	7187831	G	A	A	V	305	1	0.0326531	0.936759	0.999364
4	LOC_Os04g13050.1	7189688	T	C	A	A	197	1	0.304147	0.533569	0.853576
4	LOC_Os04g13050.1	7192466	G	A	R	STOP	79	1	0.0431034	0.917355	0.998339
4	LOC_Os04g13050.1	7192562	A	G	C	R	47	0.9375	0	0.882353	0.883081
4	LOC_Os04g13050.1	7192663	T	C	D	G	13	1	0.0462428	0.911602	0.98147
LOC_Os04g13050.1	5
4	LOC_Os04g13130.1	7240400	T	C	H	R	39	1	0	1	Fixed
4	LOC_Os04g13130.1	7240456	A	G	A	A	30	1	0.558824	0.283019	1
LOC_Os04g13130.1	2
4	LOC_Os04g40430.2	24425259	A	G	K	E	3	1	0.301887	0.536232	0.959934
4	LOC_Os04g40430.2	24425534	C	G	P	P	94	1	0.350365	0.481081	0.87465
4	LOC_Os04g40430.2	24427114	A	G	K	E	241	1	0.0160643	0.968379	1
LOC_Os04g40430.2	3
4	LOC_Os04g57940.1	34916693	G	A	T	M	229	1	0.04	0.923077	0.981276
4	LOC_Os04g57940.1	34917250	T	G	L	L	43	0.867925	0.03125	0.707214	0.88786
LOC_Os04g57940.1	2
5	Os05t0165900-01	3857022	G	A	N	N	662	0.993939	0.346591	0.474029	0.921307
5	Os05t0165900-01	3858390	G	C	N	K	206	1	0.277955	0.565	0.997615
Os05t0165900-01	2
5	Os05t0175960-00	4535377	A	G	D	D	369	0.981928	0.00364964	0.957227	0.995131
5	Os05t0175960-00	4535436	C	A	D	Y	320	0.96988	0.00420168	0.933161	0.994684
5	Os05t0175960-00	4535517	T	C	S	G	293	0.994083	0.0390244	0.913138	0.77476
5	Os05t0175960-00	4535578	A	T	C	STOP	272	0.994792	0.0347222	0.922537	0.998291
5	Os05t0175960-00	4536155	G	A	S	L	80	1	0.0588235	0.888889	0.983655
5	Os05t0175960-00	4536263	C	T	R	Q	44	1	0	1	Fixed
Os05t0175960-00	6
5	LOC_Os05g30320.1	17585524	A	G	M	V	1	0.993007	0.0204082	0.946119	0.994761
5	LOC_Os05g30320.1	17585756	A	G	G	G	26	0.559406	0.983333	0.254757	0.840311
LOC_Os05g30320.1	2
5	Os05t0444300-01	21797448	C	T	S	S	106	1	0.514085	0.32093	0.803707
5	Os05t0444300-01	21797533	A	T	I	F	135	1	0.0391459	0.924658	0.776769
5	Os05t0444300-01	21799466	A	G	N	S	318	1	0.0394737	0.924051	0.775265
5	Os05t0444300-01	21799507	A	G	N	D	332	1	0.0365854	0.929412	0.998323
Os05t0444300-01	4
5	LOC_Os05g37930.1	22286251	G	A	P	L	237	1	0.097561	0.822222	0.894105
5	LOC_Os05g37930.1	22286562	A	C	S	A	161	1	0.0322581	0.9375	0.999005
5	LOC_Os05g37930.1	22286719	C	T	K	K	108	1	0.45283	0.376623	0.725681
LOC_Os05g37930.1	3
5	Os05t0456000-01	22450907	C	T	Q	Q	137	1	0.0663265	0.875598	0.886303
5	Os05t0456000-01	22451995	A	C	S	A	12	1	0.016129	0.968254	1
Os05t0456000-01	2
5	Os05t0497675-01	24528221	C	T	G	G	95	1	0.12	0.785714	0.889747
5	Os05t0497675-01	24529502	A	C	N	T	274	1	0.0447761	0.914286	0.984051
Os05t0497675-01	2
5	Os05t0558500-00	27867606	C	T	R	H	66	0.970874	0	0.943396	0.994684
5	Os05t0558500-00	27867973	C	T	K	K	5	0.587719	1	0.259669	0.625406
Os05t0558500-00	2
6	LOC_Os06g19670.1	11298325	T	C	I	V	393	0.351351	1	0.48	0.837058
6	LOC_Os06g19670.1	11299409	G	A	T	M	305	1	0.571429	0.272727	0.704469
6	LOC_Os06g19670.1	11299576	G	A	G	G	249	0.99435	0.240458	0.601518	0.853195
6	LOC_Os06g19670.1	11300040	C	T	E	K	146	0.99359	0.213592	0.635682	0.911139
6	LOC_Os06g19670.1	11300251	C	T	V	I	98	0.992537	0.147059	0.729041	0.865102
6	LOC_Os06g19670.1	11300292	T	C	H	R	84	0.990566	0.0196078	0.942857	1
6	LOC_Os06g19670.1	11301264	C	T	C	Y	36	0.312925	0.993243	0.510706	0.906084
LOC_Os06g19670.1	7
6	LOC_Os06g36000.1	21917778	T	C	S	S	25	1	0	1	Fixed
6	LOC_Os06g36000.1	21918276	C	G	D	E	191	1	0	1	Fixed
LOC_Os06g36000.1	2
6	Os06t0640800-00	26950564	G	T	A	S	348	1	0.0322581	0.9375	0.882807
6	Os06t0640800-00	26950587	T	G	L	L	355	1	0.030303	0.941176	0.982327
6	Os06t0640800-00	26950888	T	C	F	L	456	0.952381	0.0333333	0.844821	0.88499
6	Os06t0640800-00	26950930	A	T	I	F	470	1	0.0243902	0.952381	0.985748
Os06t0640800-00	4
7	Os07t0227400-01	7153047	C	T	N	N	24	1	0.343137	0.489051	0.809585
7	Os07t0227400-01	7154985	T	A	F	Y	100	1	0.31401	0.522059	0.982298
Os07t0227400-01	2
7	Os07t0228000-01	7193231	T	C	M	V	134	1	0.40553	0.422951	0.917284
7	Os07t0228000-01	7193266	C	A	Q	H	102	1	0.0173913	0.965812	0.972302
7	Os07t0228000-01	7193276	A	C	L	V	119	1	0.391489	0.437309	0.991351
7	Os07t0228000-01	7194329	C	T	L	L	24	1	0.38191	0.447273	1
Os07t0228000-01	4
7	LOC_Os07g28040.1	17007418	T	G	K	T	276	0.964029	0.0209424	0.889613	0.993445
7	LOC_Os07g28040.1	17007496	A	C	F	L	250	1	0.520913	0.315	0.821146
7	LOC_Os07g28040.1	17009530	G	A	D	D	36	1	0.6	0.25	0.764691
LOC_Os07g28040.1	3
7	LOC_Os07g28960.1	17649648	C	A	A	STOP	111	0.988235	0.0347826	0.909554	0.996267
7	LOC_Os07g28960.1	17649717	C	T	V	I	88	0.993464	0.436508	0.380556	0.804544
7	LOC_Os07g28960.1	17650246	A	G	L	L	9	0.808824	0.0298507	0.623013	0.81088
LOC_Os07g28960.1	3
8	Os08t0372900-02	17527802	G	A	H	H	378	0.987097	0.257919	0.565659	0.794437
8	Os08t0372900-02	17527876	C	T	G	D	344	0.983607	0.0124481	0.943163	1
8	Os08t0372900-02	17529583	G	C	L	V	258	0.869565	0.0140187	0.742016	0.84459
8	Os08t0372900-02	17531163	A	C	I	S	164	0.990909	0.347458	0.467562	0.888761
8	Os08t0372900-02	17531179	T	G	K	Q	159	1	0.398148	0.430464	0.779356
Os08t0372900-02	5
8	Os08t0477600-01	23640721	T	A	I	F	183	1	0.0045045	1	Fixed
8	Os08t0477600-01	23640800	T	C	S	S	156	1	0	0.992	Fixed
8	Os08t0477600-01	23640955	A	G	S	P	105	1	0	0.992674	Fixed
8	Os08t0477600-01	23642017	A	G	V	A	30	1	0	0.952381	Fixed
Os08t0477600-01	4
8	LOC_Os08g41240.1	26132410	C	A	E	D	304	1	0.0892857	0.836066	0.881069
8	LOC_Os08g41240.1	26132692	G	A	G	G		1	0	1	Fixed
8	LOC_Os08g41240.1	26132886	T	C	S	G	146	1	0	1	Fixed
LOC_Os08g41240.1	3
8	LOC_Os08g41540.1	26329200	C	G	G	R	747	0.923529	0.202429	0.528368	0.730867
8	LOC_Os08g41540.1	26329556	C	T	R	H	628	0.944162	0.226766	0.530147	0.737961
8	LOC_Os08g41540.1	26330909	G	T	Q	K	359	1	0.416149	0.412281	1
8	LOC_Os08g41540.1	26331873	C	G	P	P	37	1	0.550847	0.289617	0.771185
LOC_Os08g41540.1	4
8	Os08t0535800-02	26855387	G	A	R	R	24	1	0.553459	0.287449	0.728331
8	Os08t0535800-02	26855613	G	A	D	N	73	1	0.0163934	0.967742	1
8	Os08t0535800-02	26855666	T	G	H	Q	90	0.953488	0	0.911111	0.811322
Os08t0535800-02	3
8	Os08t0542600-01	27230962	A	G	R	G	89	1	0	1	Fixed
8	Os08t0542600-01	27232411	T	C	T	T	266	1	0.591304	0.256831	0.998337
Os08t0542600-01	2
8	LOC_Os08g45070.1	28381658	A	G	E	G	31	1	0.00934579	0.981481	1
8	LOC_Os08g45070.1	28381742	G	A	S	N	57	1	0	1	Fixed
8	LOC_Os08g45070.1	28381878	T	C	D	D		1	0	1	Fixed
LOC_Os08g45070.1	3
9	LOC_Os09g01620.1	383985	A	G	K	R	22	0.777778	0.0285714	0.58318	0.84165
9	LOC_Os09g01620.1	384027	T	G	V	G	36	1	0.0289855	0.943662	1
9	LOC_Os09g01620.1	384430	T	A	A	A	118	1	0.395556	0.433121	0.989296
9	LOC_Os09g01620.1	387815	A	G	I	V	305	0.673611	0.0276498	0.458154	0.723263
LOC_Os09g01620.1	4
9	LOC_Os09g02690.1	1146034	A	C	Y	D	199	1	0.0327273	0.93662	1
9	LOC_Os09g02690.1	1146352	C	T	V	M	93	1	0.0446429	0.91453	0.995013
9	LOC_Os09g02690.1	1157763	G	A	H	H	17	1	0.030303	0.941176	1
LOC_Os09g02690.1	3
9	LOC_Os09g04020.1	2009097	G	A	A	V	256	0.961749	0.114428	0.722143	0.869116
9	LOC_Os09g04020.1	2009184	T	C	D	G	227	0.993671	0.0247525	0.939122	1
9	LOC_Os09g04020.1	2009903	A	G	I	T	129	1	0.0238095	0.953488	0.942997
9	LOC_Os09g04020.1	2009927	T	C	Q	R	121	1	0.0213904	0.958115	0.944314
9	LOC_Os09g04020.1	2010438	A	G	L	L	80	1	0.0205128	0.959799	0.9446
9	LOC_Os09g04020.1	2010450	G	A	R	C	76	1	0.019802	0.961165	0.740925
LOC_Os09g04020.1	6
9	LOC_Os09g08600.1	5048053	T	A	A	A	122	0.342857	0.986547	0.464767	0.796898
9	LOC_Os09g08600.1	5048079	G	A	P	S	114	1	0.030303	0.941176	1
LOC_Os09g08600.1	2
9	Os09t0454200-01	17717394	A	G	M	T	465	1	0.00416667	0.991701	1
9	Os09t0454200-01	17718479	C	A	V	V	132	1	0.512727	0.322115	0.859245
9	Os09t0454200-01	17720795	A	T	V	D	75	1	0.0153846	0.969697	1
9	Os09t0454200-01	17720835	C	A	V	L	62	1	0.490196	0.342105	0.9389
Os09t0454200-01	4
9	Os09t0498700-01	19942260	C	T	A	V	267	1	0.00749064	0.98513	1
9	Os09t0498700-01	19942713	G	C	A	P	377	1	0.00930233	0.981567	1
9	Os09t0498700-01	19943329	G	A	C	Y	461	1	0.581967	0.264249	1
9	Os09t0498700-01	19943375	C	T	N	N	476	1	0.496032	0.33687	0.902114
Os09t0498700-01	4
9	Os09t0538800-01	22045845	C	T	V	I	423	1	0.252294	0.59707	0.983975
9	Os09t0538800-01	22047066	G	A	F	F	207	0.172131	0.771552	0.360448	0.454276
Os09t0538800-01	2
10	LOC_Os10g30450.1	16284779	T	C	D	D	109	1	0	1	Fixed
10	LOC_Os10g30450.1	16284836	G	C	E	D	128	1	0	1	Fixed
LOC_Os10g30450.1	2
10	Os10t0476500-01	18209176	A	G	C	R	398	1	0	1	Fixed
10	Os10t0476500-01	18209765	A	T	A	A	232	0.952381	0	0.909091	0.785247
10	Os10t0476500-01	18210346	C	T	A	T	39	0.928571	0.105263	0.678613	0.853415
Os10t0476500-01	3
10	LOC_Os10g33730.2	18258299	G	A	S	S	694	0.949438	0.0041841	0.895431	0.971148
10	LOC_Os10g33730.2	18258435	A	G	L	P	649	0.949749	0	0.904306	0.973587
10	LOC_Os10g33730.2	18258649	C	T	D	N	578	0.973958	0	0.949239	0.988735
10	LOC_Os10g33730.2	18258945	A	G	M	T	479	0.95858	0	0.920455	0.998419
10	LOC_Os10g33730.2	18259233	T	A	D	V	383	0.956989	0.00722022	0.903218	0.966648
10	LOC_Os10g33730.2	18259647	C	T	R	H	245	0.946078	0	0.897674	0.967519
10	LOC_Os10g33730.2	18260289	T	C	N	S	31	0.953488	0	0.911111	0.785586
LOC_Os10g33730.2	7
10	Os10t0548100-01	21899830	G	A	D	D	268	1	0.526316	0.310345	0.828341
10	Os10t0548100-01	21899898	A	G	F	L	246	1	0	1	1
Os10t0548100-01	2
10	LOC_Os10g40780.1	22340364	C	T	R	R	2341	1	0.576037	0.269006	1
10	LOC_Os10g40780.1	22350842	T	C	I	V	1108	1	0.272727	0.571429	0.965462
LOC_Os10g40780.1	2
10	LOC_Os10g42080.1	23090490	A	G	F	L	197	1	0.0131579	0.974026	0.98847
10	LOC_Os10g42080.1	23090815	C	G	L	L	88	1	0.0652174	0.877551	0.881747
LOC_Os10g42080.1	2
11	LOC_Os11g03220.1	1150086	A	G	P	P	345	1	0.0697674	0.869565	0.870822
11	LOC_Os11g03220.1	1151224	G	A	P	S	257	1	0.0434783	0.916667	0.974613
11	LOC_Os11g03220.1	1151481	C	T	A	T	213	1	0.0511364	0.902703	0.972941
LOC_Os11g03220.1	3
11	Os11t0265900-01	9154605	A	C	A	A	154	0.990566	0.0434783	0.898016	0.888225
11	Os11t0265900-01	9154801	G	C	E	Q	220	1	0.0201613	0.960474	0.979541
11	Os11t0265900-01	9155166	G	A	V	I	315	1	0.0530973	0.89916	0.972759
11	Os11t0265900-01	9155826	G	T	L	V	535	0.994048	0.0522088	0.888962	0.890198
11	Os11t0265900-01	9156118	C	G	T	R	632	1	0.371179	0.458599	0.778057
11	Os11t0265900-01	9156171	G	A	V	M	650	0.993902	0.338912	0.482451	0.875716
Os11t0265900-01	6
11	Os11t0302700-01	11406920	C	A	V	L	343	0.986486	0	0.973333	1
11	Os11t0302700-01	11407315	G	A	F	F	268	0.969925	0.273632	0.515397	0.790369
Os11t0302700-01	2
11	Os11t0453550-01	17121433	A	G	S	P	92	0.980519	0.0131004	0.935938	0.997875
11	Os11t0453550-01	17121503	A	G	G	G	68	1	0.490291	0.34202	0.918342
Os11t0453550-01	2
11	Os11t0638200-00	27061054	T	A	I	N	30*	0.885714	0.173077	0.509613	0.676663
11	Os11t0638200-00	27061096	C	T	P	L	44*	0.981818	0.551724	0.258594	0.621596
11	Os11t0638200-00	27061412	A	G	E	G	77*	0.988095	0.265625	0.557876	0.890364
11	Os11t0638200-00	27061658	C	T	A	V	159*	1	0.4	0.428571	0.972658
11	Os11t0638200-00	27063354	G	T	V	F	307*	1	0.473684	0.357143	0.836897
11	Os11t0638200-00	27063530	C	T	A	A	365*	1	0.551724	0.288889	0.742766
Os11t0638200-00	6
12	LOC_Os12g38460.1	23810694	A	G	V	A	1041	0.987952	0.00381679	0.968587	0.989154
12	LOC_Os12g38460.1	23812572	G	T	G	G	499	0.992308	0.560209	0.268752	1
LOC_Os12g38460.1	2
12	Os12t0637100-02	27531427	C	T	T	T	243	1	0.426966	0.401575	0.802871
12	Os12t0637100-02	27533214	T	G	S	R	93	1	0.0212766	0.958333	0.989073
Os12t0637100-02	2
*The position of the amino acid residue according to 93-11 protein
